# Supplementary material for: Evolution of synchronous female bilateral breast cancers and response to treatment
Source: PubMed Central journal article supplement (PMC10033420; doi:10.1038/s41591-023-02216-8), 2023-03-06
Supplement: 41591_2023_2216_MOESM1_ESM.pdf [file 41591_2023_2216_MOESM1_ESM.pdf]

---

# Evolution of synchronous female bilateral breast cancers and response to treatment

---

In the format provided by the  
authors and unedited

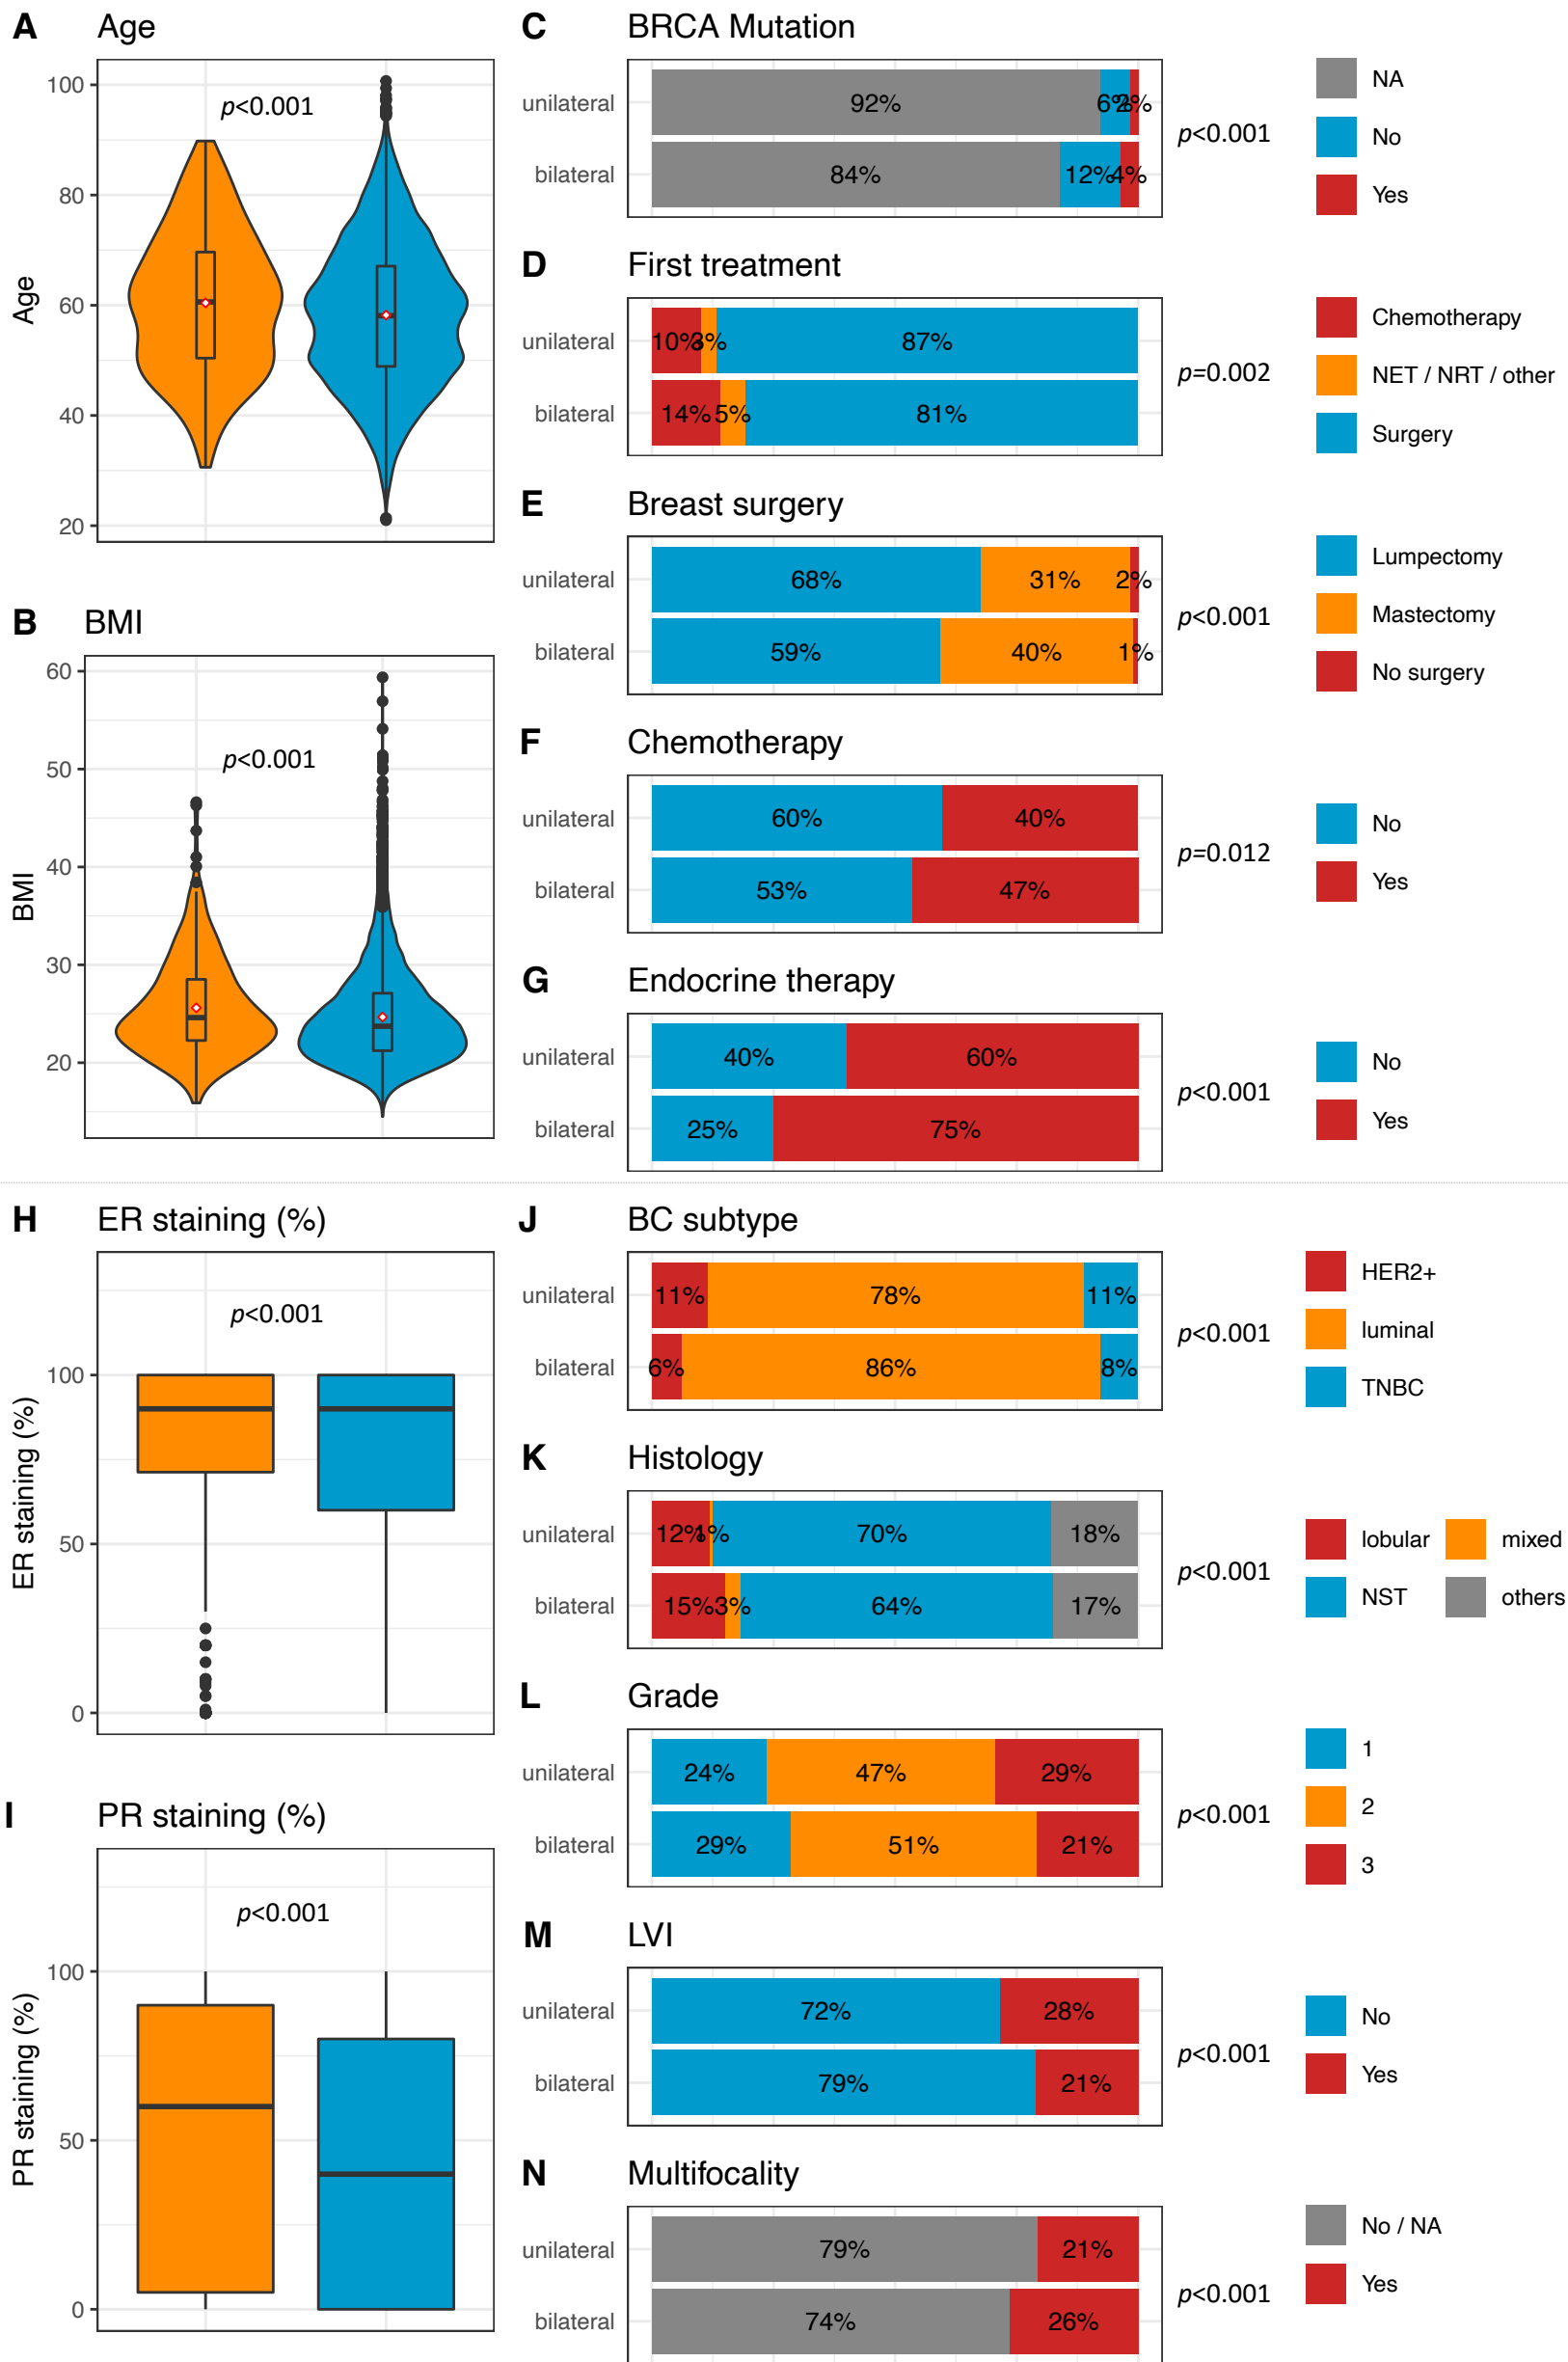

**Supplementary figure 1: Comparison of the patient's and tumor's characteristics according to the unilateral or bilateral character of the tumor.** The sBBCs cohort comprises 404 patients carrying 804 sBBCs that are compared with 17171 patients with unilateral breast cancers. Comparison of the bilaterality regarding (i) patients characteristics: A. Age at breast cancer diagnosis (n=17173); B. BMI (n=11232); C. Presence of a germline mutation of *BRCA1* or *BRCA2*; D. First treatment; E. Breast surgery; F. Chemotherapy; G. Endocrine therapy; (ii) tumor's characteristics: H. ER staining (as percentage) (n=14500); I. PR staining (as percentage) (n=13755); J. breast cancer subtype; K. Histological type; L. Tumor grade; M. Lymphovascular invasion; N. Multifocality. In all the boxplots (Supplementary figure 1A-B) and in the violin plots (Fig1H-I), lower and upper bars represent the first and third quartile, respectively, the medium bar is the median, and whiskers extend to 1.5 times the inter-quartile range. Statistical tests were chi-square tests (Supplementary figure 1C-G, J-M) and Student t-tests (Fig1A-B, H-I) when indicated. Exact p-values for tests in Supplementary figure 1A-C are  $p = 0.00057$ ,  $p = 0.00019$ ,  $p = 2.08E-05$  respectively; Supplementary figure 1E:  $p = 2.00E-07$ ; Supplementary figure 1G-N:  $p = 1.63E-09$ ,  $p = 5.1E-10$ ,  $p = 0.00012$ ,  $p = 3.89E-07$ ,  $p = 2.80E-15$ ,  $p = 4.13E-06$ ,  $p = 0.0003$ ,  $p = 8.29E-05$  respectively. Abbreviations: BMI, body mass index; ER, estrogen receptor; LVI, lymphovascular invasion; NET, neoadjuvant endocrine therapy; NRT, neoadjuvant radiotherapy; PR, progesterone receptor.

A

## Stromal TIL levels

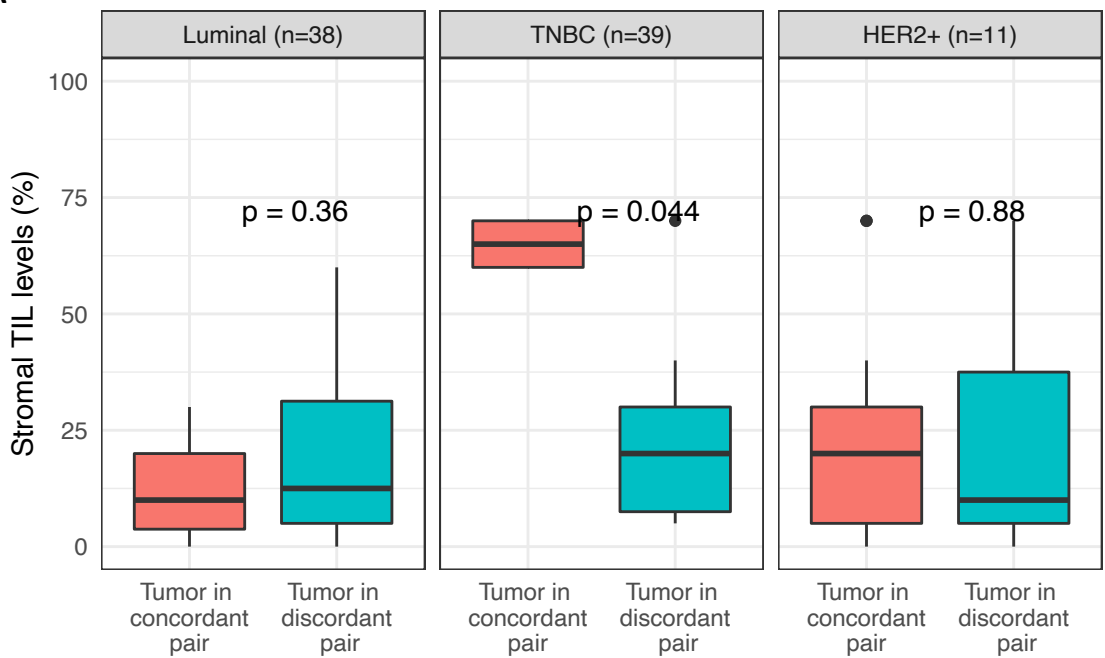

P interaction BC subtype and concordance status on str TILS=0.0066

B

## Intratumoral TIL levels (%)

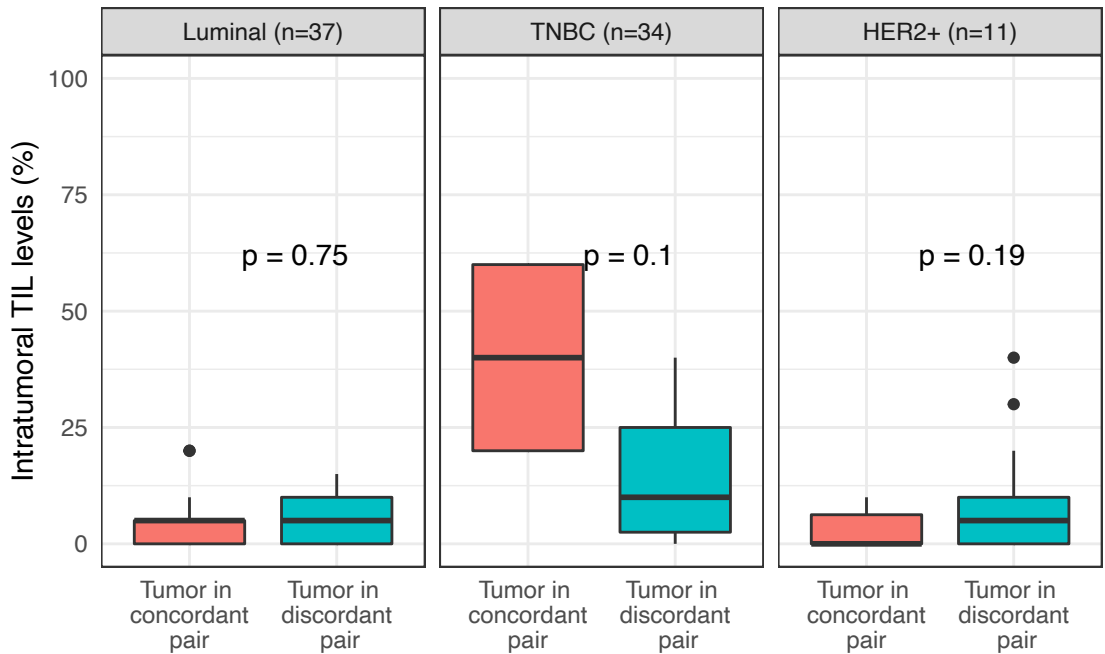

P interaction BC subtype and concordance status on IT TILS=0.0056

**Supplementary figure 2: Immune infiltration levels by breast cancer subtype and by the concordance status of tumor pairs in the validation cohort of the GBG**

The cohort from the GBG (German breast group) comprised 105 patients with sBBCs treated within four neoadjuvant chemotherapy trials. A. Stromal TIL levels of the index tumor by breast cancer subtype and by the concordance status of the pair it belongs to; B. Intratumoral TIL levels of the index tumor by breast cancer subtype and by the concordance status of the pair it belongs to. In boxplots, lower and upper bars represent the first and third quartile, respectively, the medium bar is the median, and whiskers extend to 1.5 times the inter-quartile range. Statistical tests were Wilcoxon tests, all tests are two sided.

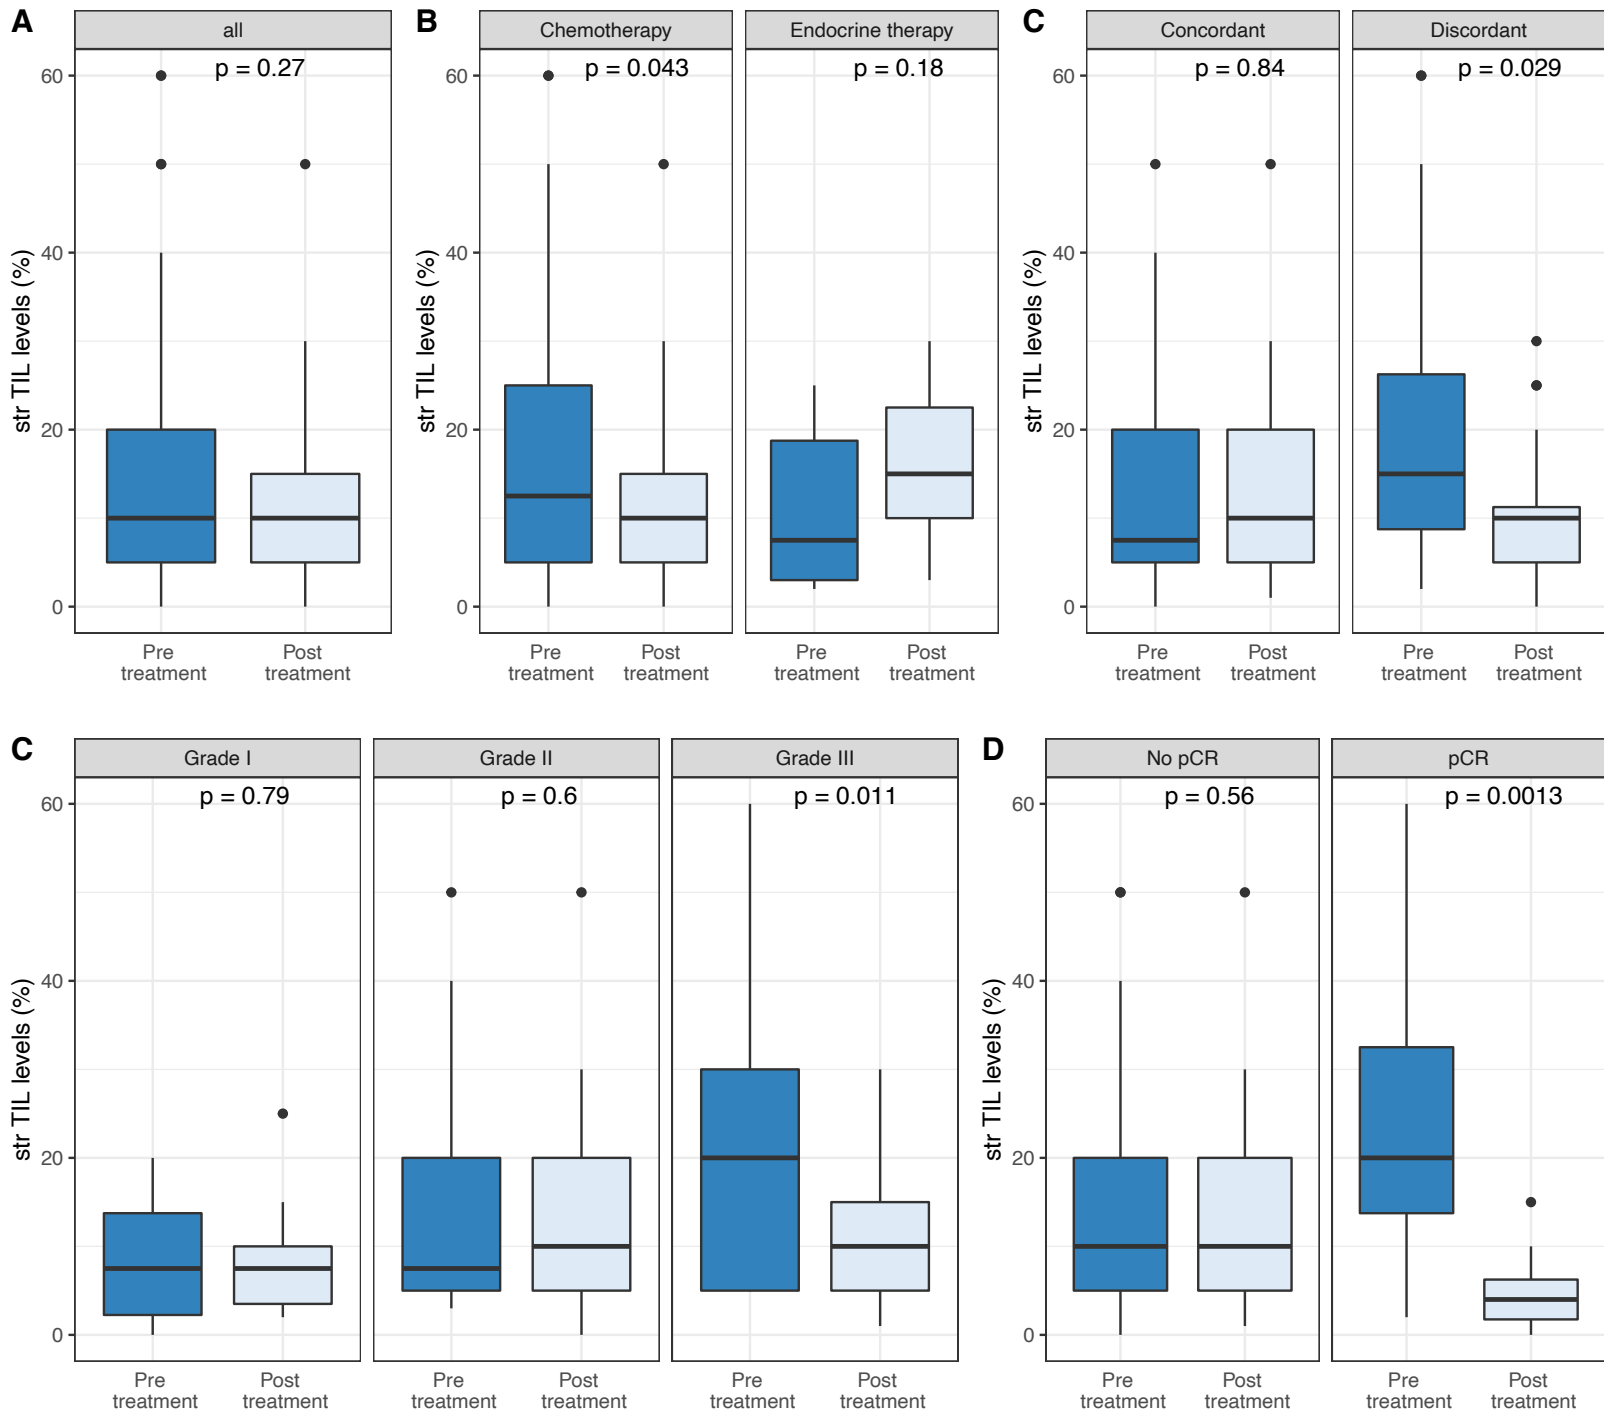

**Supplementary figure 3: Stromal TIL levels before and after neoadjuvant treatment (NAT).**

The cohort comprises 37 patients (n=74 tumors) with sBBCs treated with neoadjuvant treatment; A. Box plots of pre and post treatment stromal TIL levels in the whole population ; B. according to the type of treatment ; C. according to the concordant or discordant status of the pair; C. according to the tumor grade; D. according to the pCR status. Each boxplot represents the median value and associated interquartile range. In boxplots, lower and upper bars represent the first and third quartile, respectively, the medium bar is the median, and whiskers extend to 1.5 times the inter-quartile range. Statistical tests were Wilcoxon tests, all statistical tests are two sided. Abbreviations: pCR: pathological complete response.

## Response to NAC

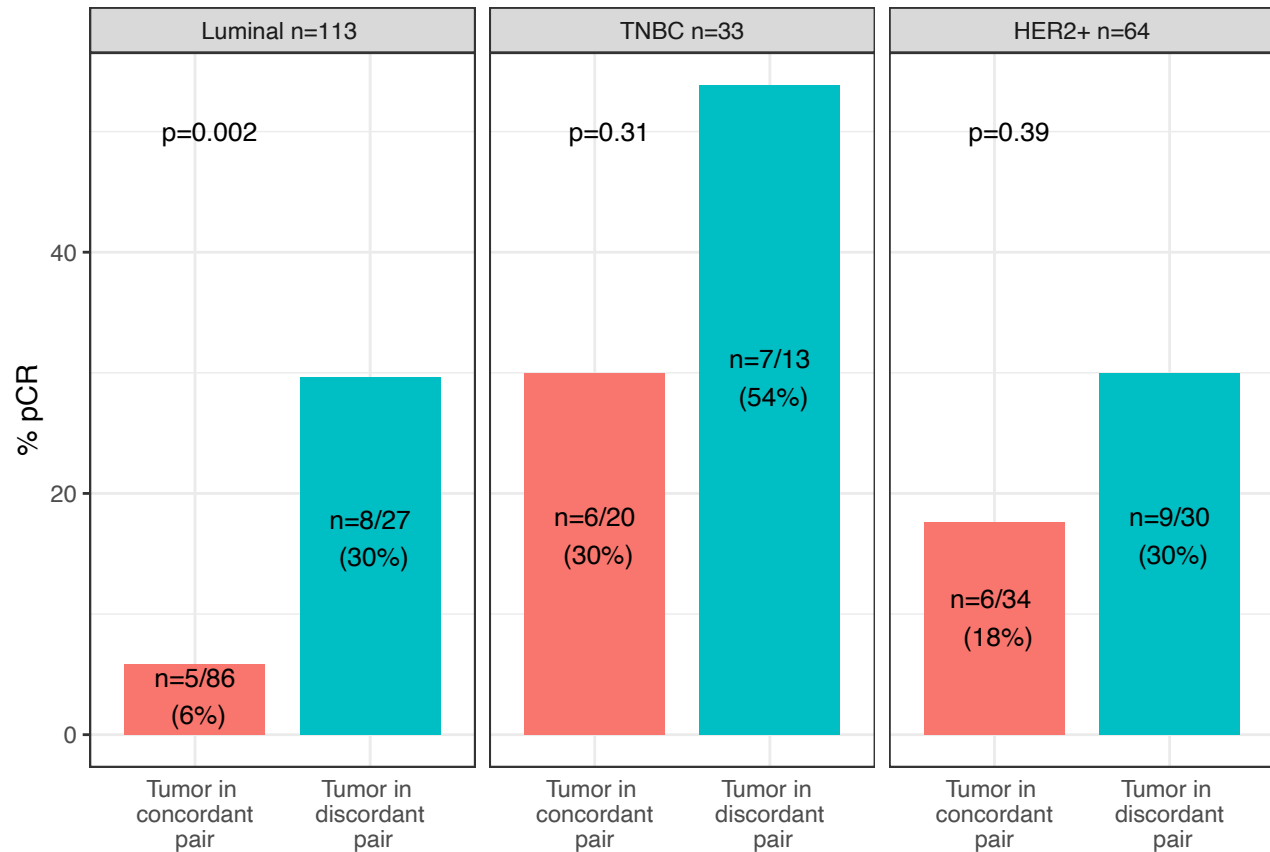

Pinteraction between BC subtype and concordance status :  $p=0.25$

### Supplementary figure 4: pCR rates of pairs of sBBCs according to the breast cancer subtype and the concordance status of the tumor pair in the validation cohort of the GBG

The cohort from the GBG (German breast group) comprised 105 patients with sBBCs treated within four neoadjuvant chemotherapy trials. Statistical tests were chi-square tests, all statistical tests are two-sided. Abbreviations: pCR: pathological complete response; sBBCs: synchronous bilateral breast cancer.

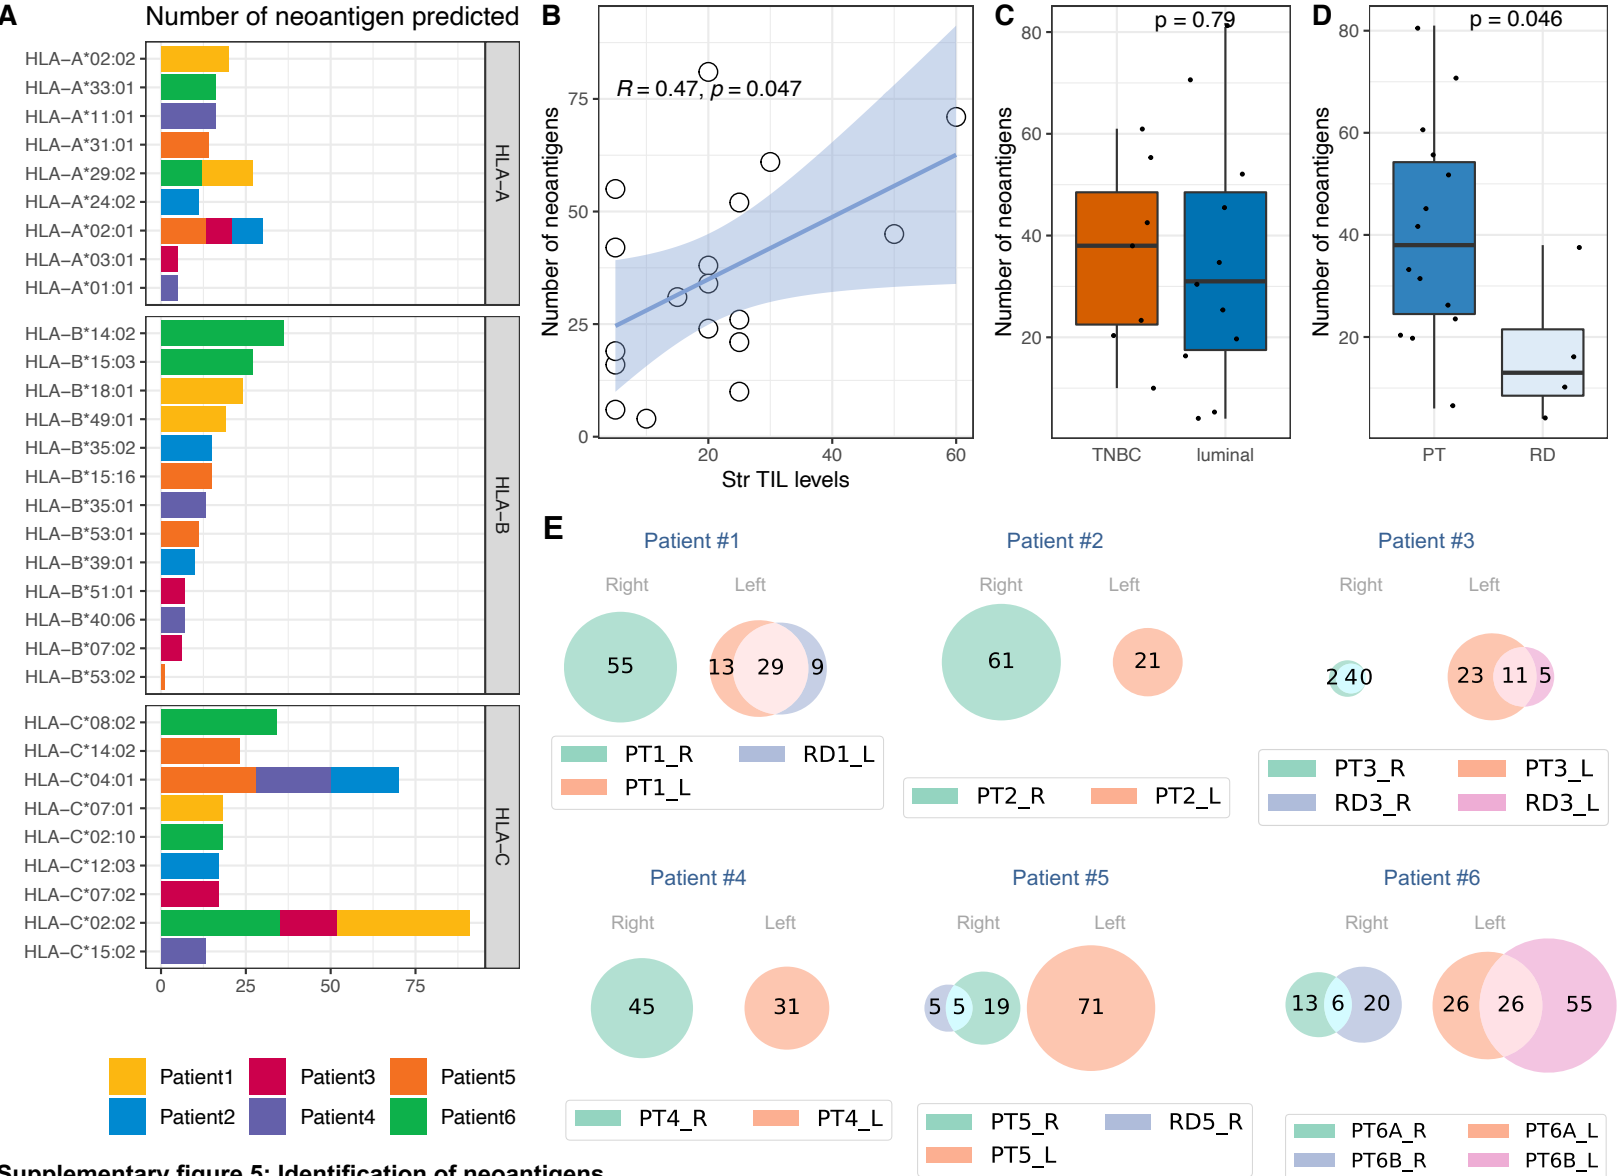

### Supplementary figure 5: Identification of neoantigens

The analyses are performed in the in left, right, pre and post-NAC samples of a cohort of 6 patients (20 samples). Number of neoantigens predicted by A. Type of HLA; B. Stromal TIL levels; C. BC subtype; D. Type of sample (PT/RD); E. Neoantigen sharing between samples. Abbreviations: PT, patient; RD, residual disease; str TIL, stromal tumor infiltrating lymphocytes; TNBC: triple negative breast cancer. In all boxplots (Supplementary figure 5C-D), lower and upper bars represent the first and third quartile, respectively, the medium bar is the median, and whiskers extend to 1.5 times the inter-quartile range. Statistical tests were Wilcoxon tests in boxplots and are two-sided and Pearson correlation coefficients in Supplementary figure 5B. The lines represent the fitted linear regression line and the colored bands represent the 95% confidence interval bands.

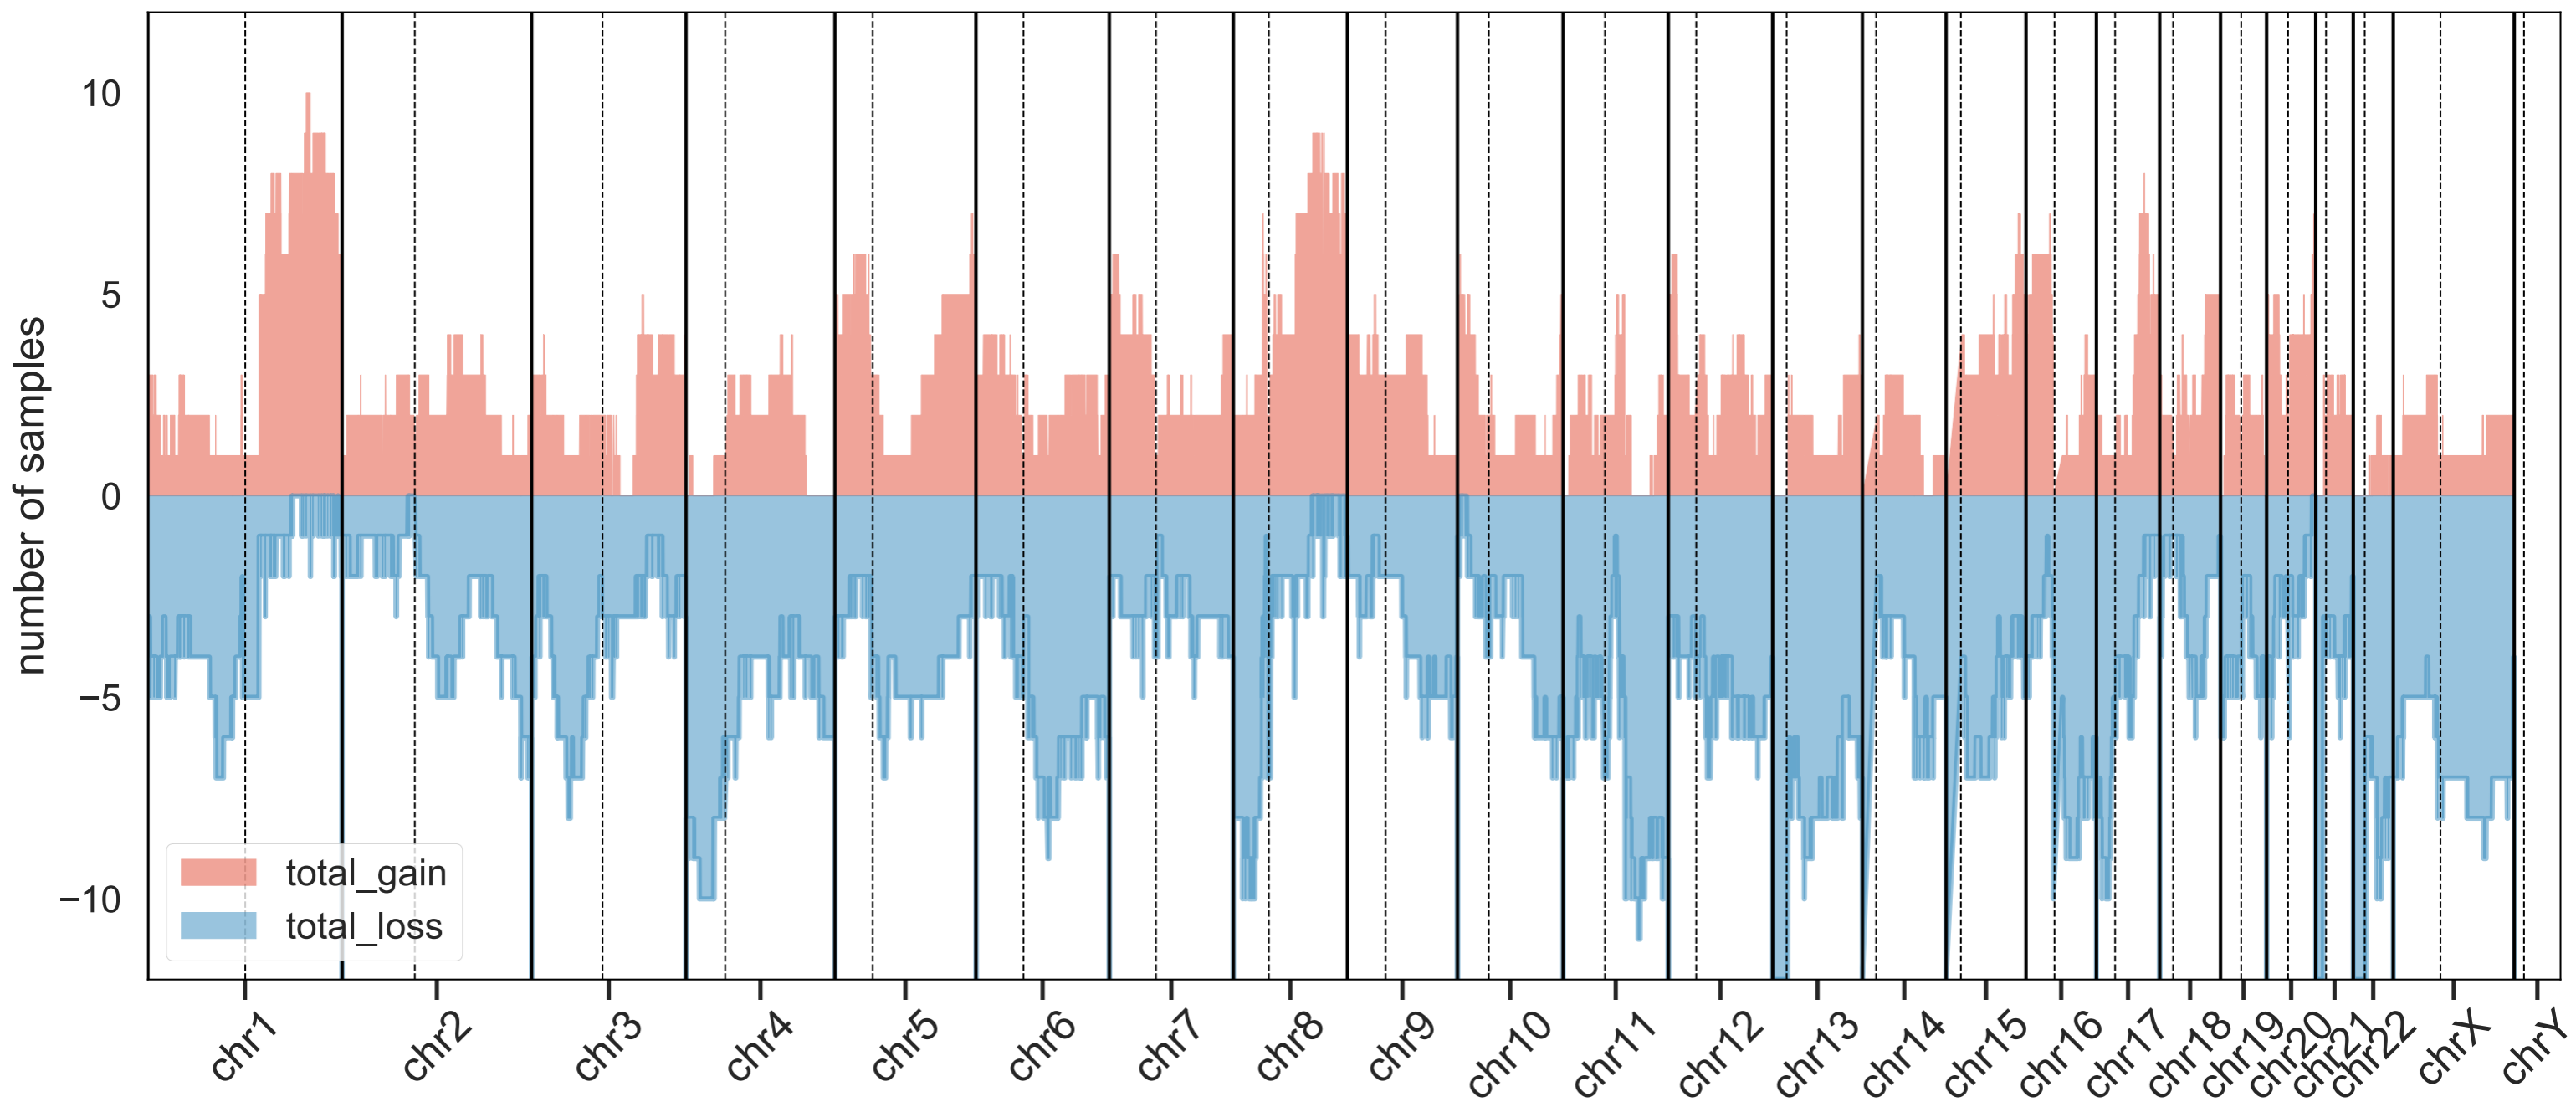

**Supplementary figure 6: Copy number patterns of the genomes of the 14 primary tumors.**

The total percentage of gain/loss is listed by the cumulative change per sample.

Chr, chromosome

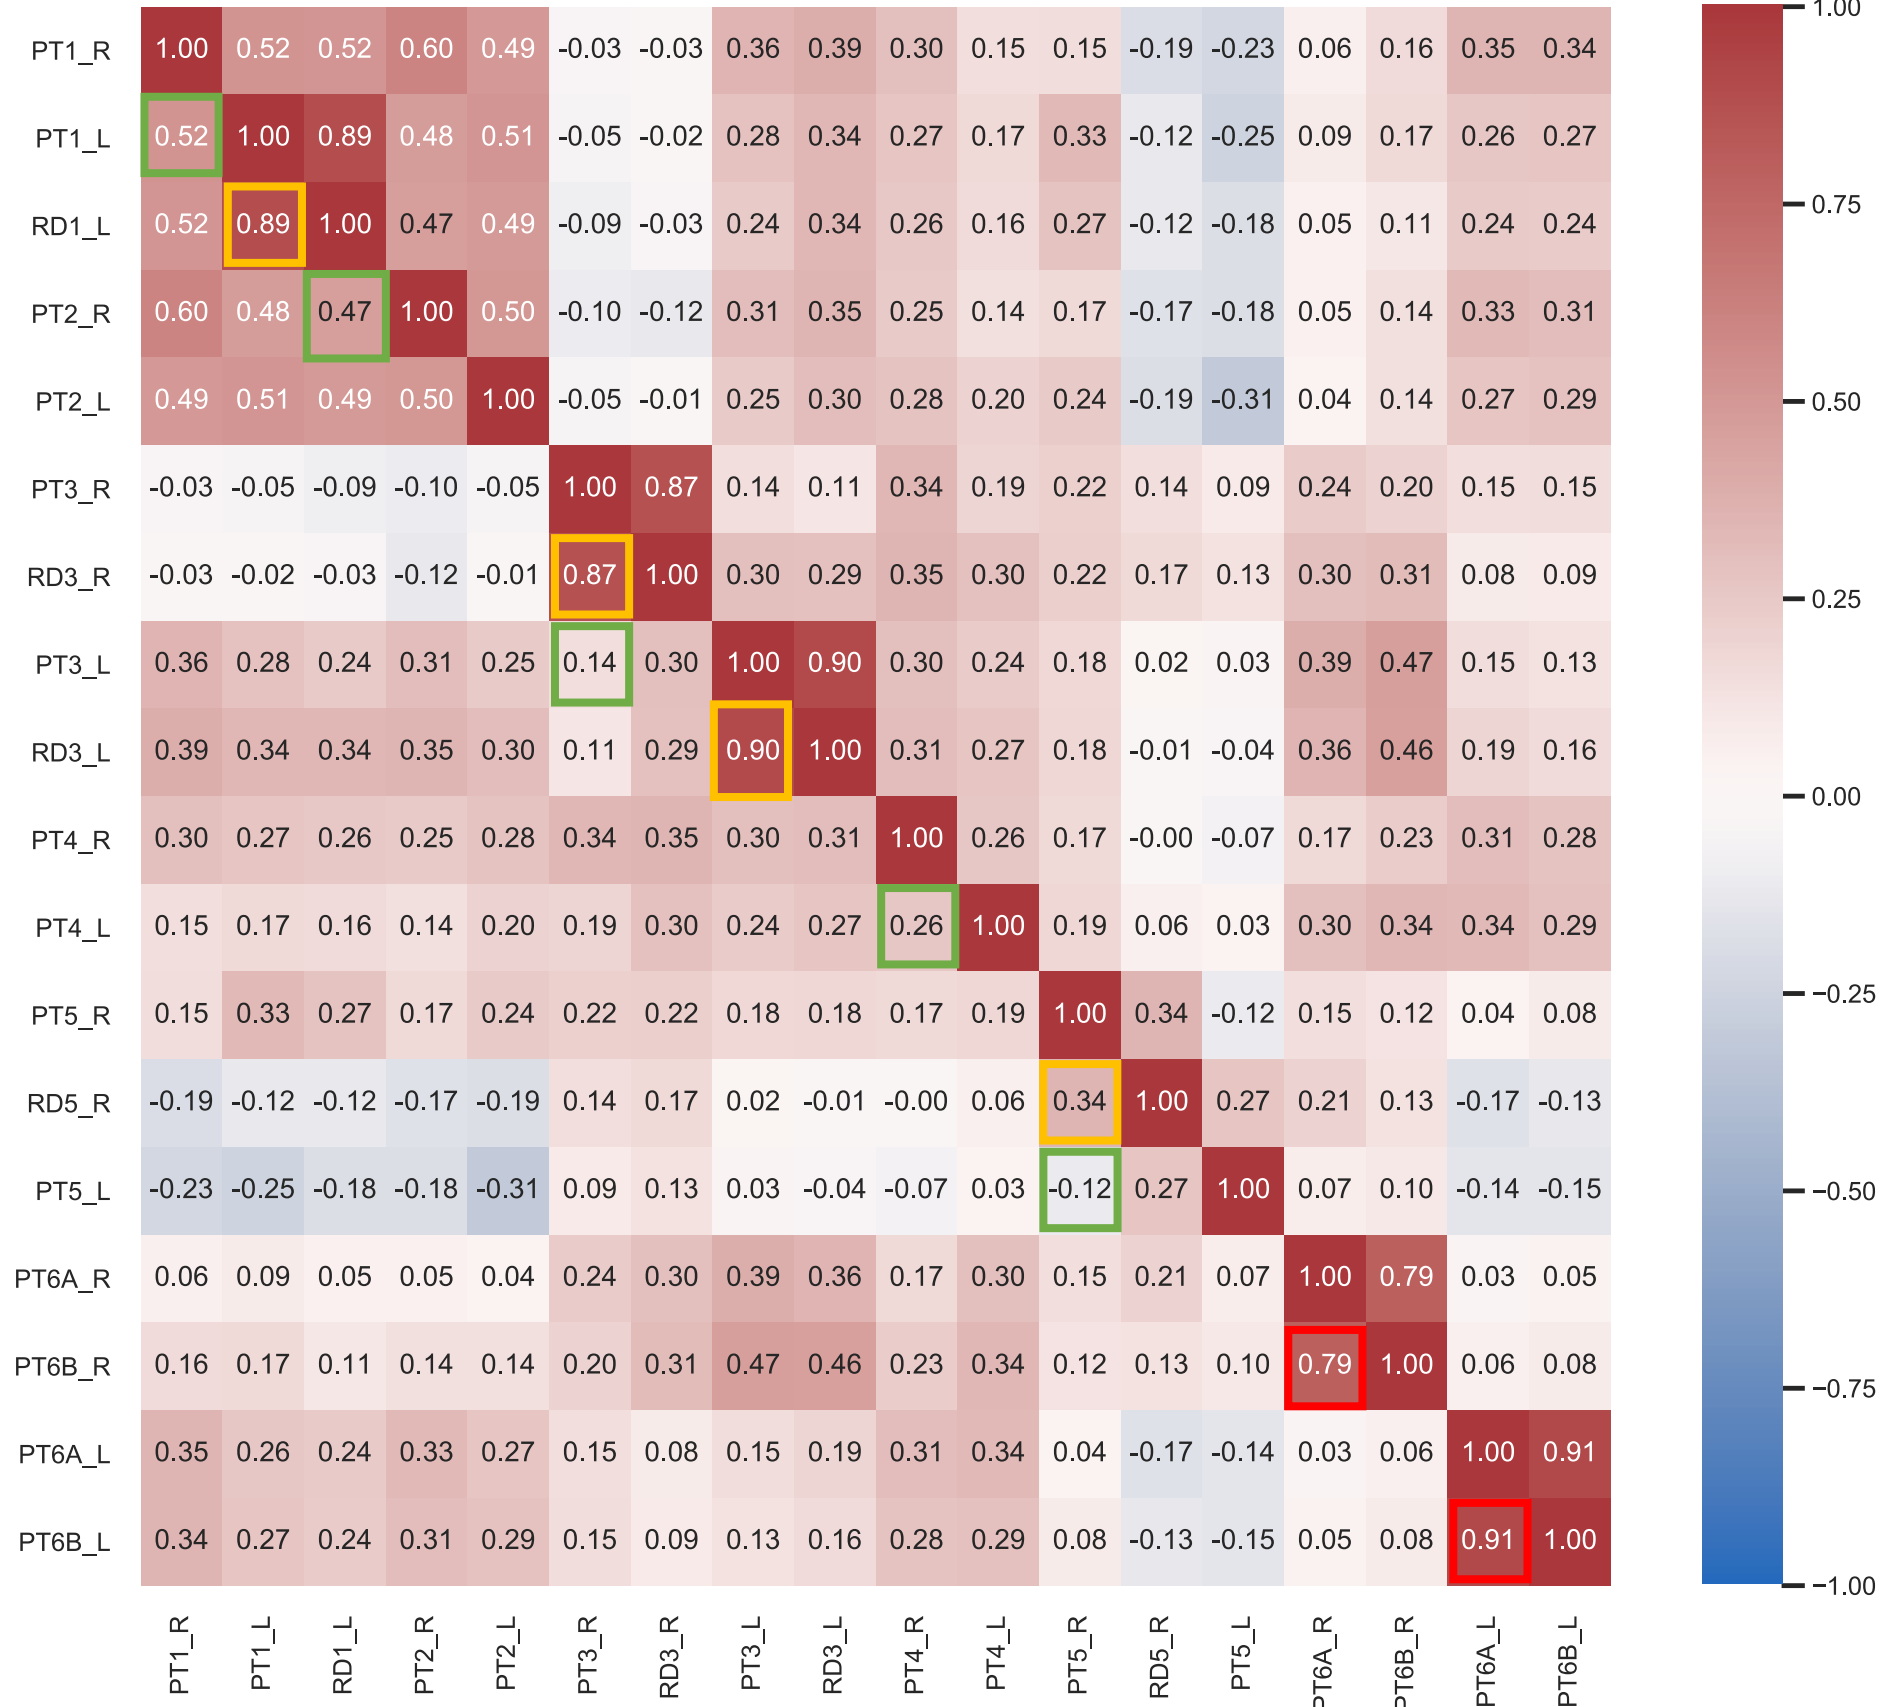

Paired left/right tumors

Paired PT/RD

Paired bicentric tumors

### Supplementary figure 7: Similarity between samples regarding copy number profiles.

Pairwise cosine similarity of the copy number profiles of the 18 samples of the cohort with sufficient quality criteria (samples RD4\_R and RD6B\_R were discarded from the analyses). The colored bordered squares represent the comparison of paired data (left and the right tumors of a pairs of synchronous bilateral breast cancer: green bordered squares; between PT and related RDs: yellow bordered squared; samples of the same side of a patient: red bordered squares).



**A**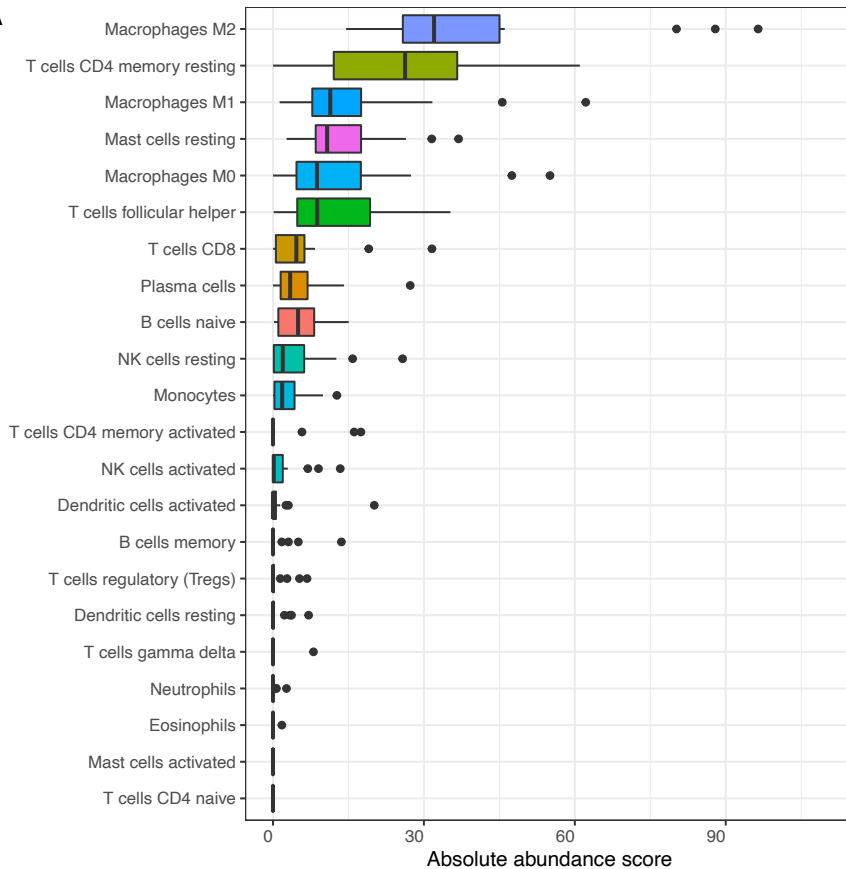**B**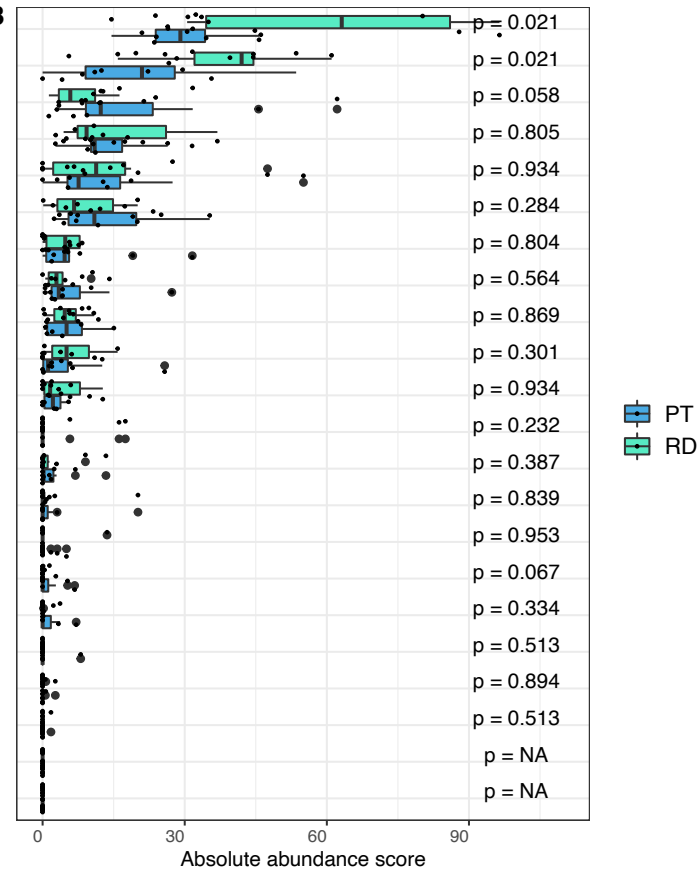

**Supplementary figure 8: Composition of the immune microenvironment (22 immune subpopulations) of the sBBCs cohort (from the CIBERSORT algorithm).** The analyses are performed in the in left, right, pre and post-NAC samples of a cohort of 6 patients (20 samples). The composition of the immune microenvironment (22 immune subpopulations) was deconvoluted by the CIBERSORT algorithm (absolute mode) as described by Newman; A. Composition of the immune microenvironment in the whole population; B. According to the type of sample (PT *versus* RD) samples; Abbreviations: L, left; PT, primary tumor; R, right; RD, residual disease; sBBC, synchronous bilateral breast cancer. In boxplots, lower and upper bars represent the first and third quartile, respectively, the medium bar is the median, and whiskers extend to 1.5 times the inter-quartile range. Statistical tests were Wilcoxon tests, all tests are two-sided.

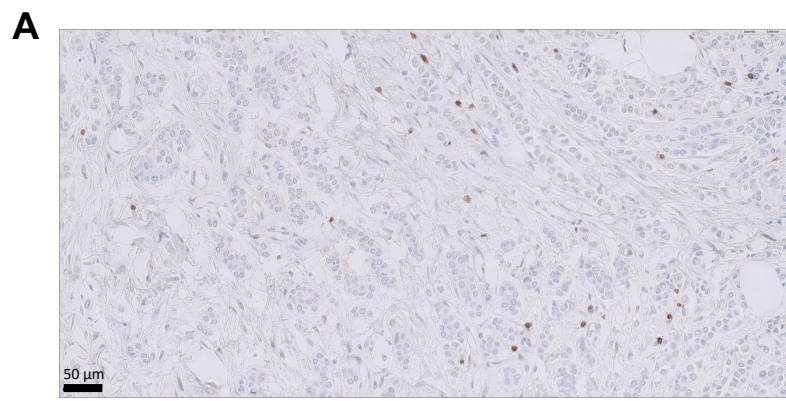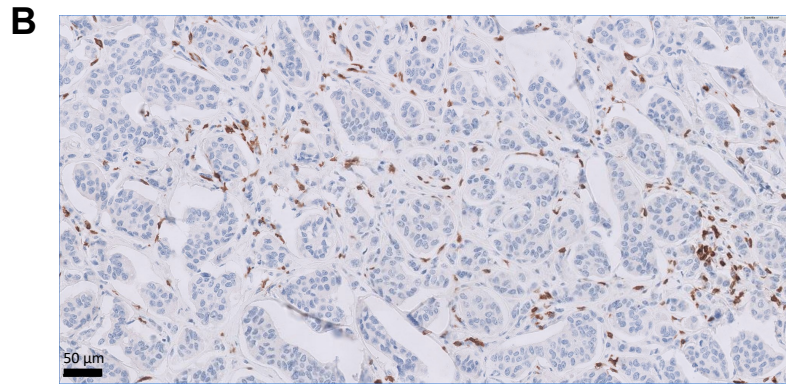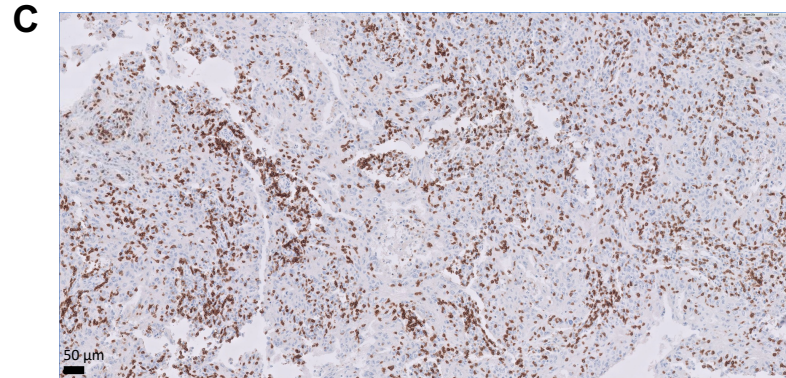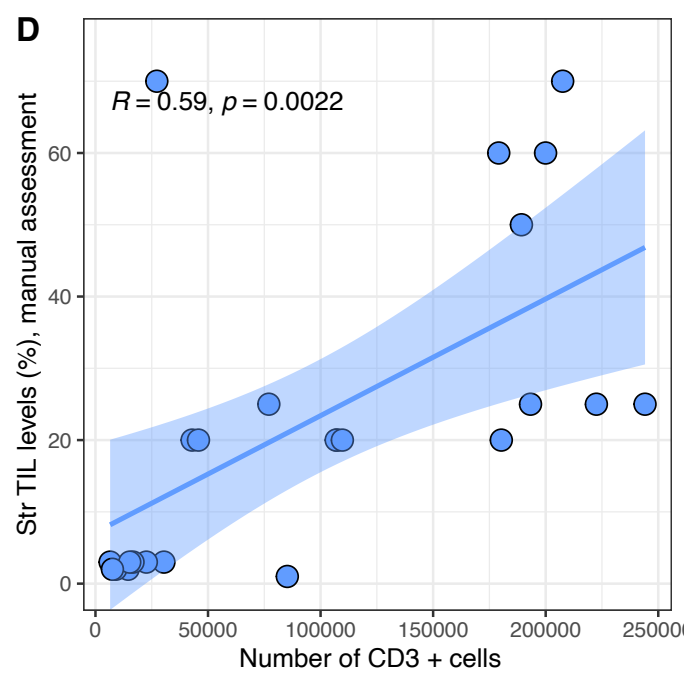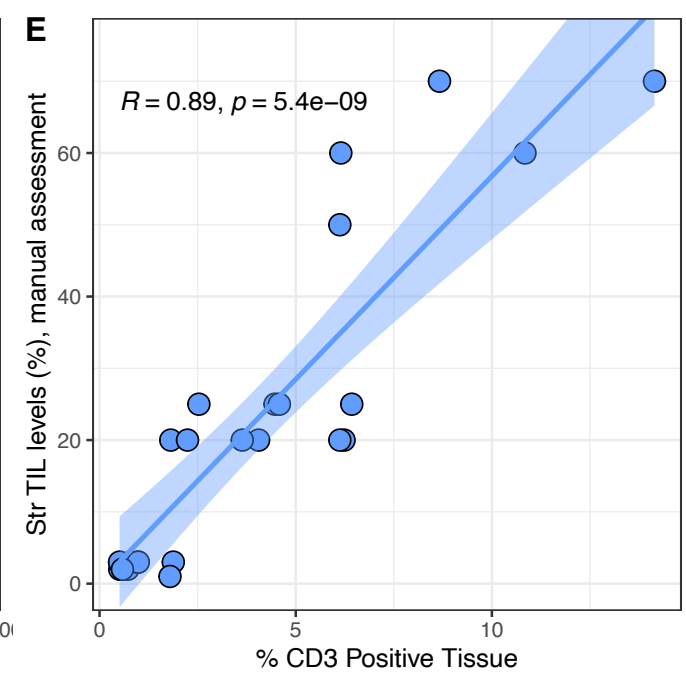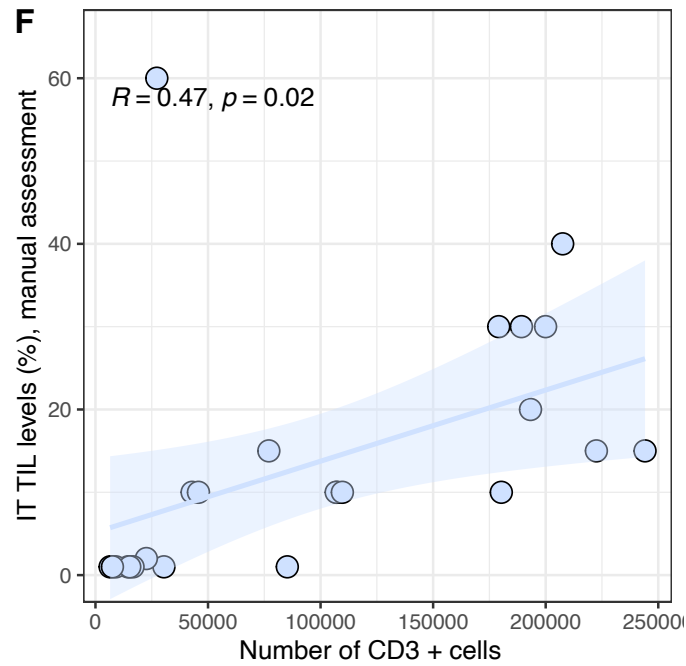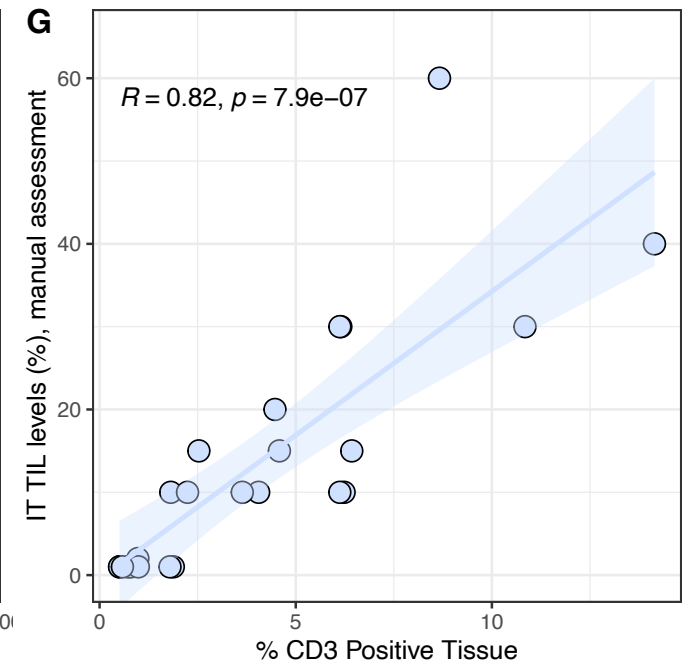

**Supplementary figure 9: Comparison between TIL levels on unstained slides and immune infiltration assessed with a CD3 immunostaining.**

Immunohistochemistry staining was performed on a subset of 24 samples out of the cohort of 277 samples with TILs manual review available. A: Manual review: stromal TILs 2 %, intratumoral TILs 1%; Percentage of CD3+ tissue: 0.72; B: Manual review: stromal TILs 25 %, intratumoral TILs 15%; Percentage of CD3+ tissue : 4.58 ; C: Manual review: stromal TILs 70 %, intratumoral TILs 40%; Percentage of CD3+ tissue : 14.1; D: Correlation between unstained stromal TILs and the number of CD3+ positive cells; E. Correlation between unstained stromal TILs and the percentage of CD3+ Tissue ; F. Correlation between unstained intratumoral TILs and the number of CD3+ positive cells; G. Correlation between unstained intratumoral TILs and the percentage of CD3 positive tissue. Statistical test was Pearson correlation coefficients. The lines represent the fitted linear regression line and the colored bands represent the 95% confidence interval bands. The staining was performed once for every case. Black scale (bottom left) represents 50  $\mu$ m.

Supplementary Table 1: Comparison of the patients and tumor characteristics according to the unilateral or synchronous bilateral character of the tumor.

| variable                                    | level               | bilateral   | unilateral   | <i>p</i>         |
|---------------------------------------------|---------------------|-------------|--------------|------------------|
| <b>Patient level</b>                        | <b>n</b>            | <b>404</b>  | <b>17171</b> | <b>17175</b>     |
| <b>Age</b>                                  |                     | 60.4 (12.8) | 58.2 (12.8)  | <b>0.001</b>     |
| <b>Age class</b>                            | <40                 | 17 (4.2)    | 1264 (7.4)   | <b>0.01</b>      |
|                                             | [40-50[             | 76 (18.9)   | 3565 (20.8)  |                  |
|                                             | [50-60[             | 103 (25.6)  | 4785 (27.9)  |                  |
|                                             | [60-70[             | 110 (27.3)  | 4323 (25.2)  |                  |
|                                             | >=70                | 97 (24.1)   | 3233 (18.8)  |                  |
| <b>BMI</b>                                  |                     | 25.6 (5.0)  | 24.7 (4.8)   | <b>&lt;0.001</b> |
| <b>BMI class</b>                            | <18.5               | 11 (2.9)    | 471 (4.2)    | <b>0.019</b>     |
|                                             | 18.5-24.9           | 193 (51.7)  | 6441 (57.2)  |                  |
|                                             | 25-29.9             | 103 (27.6)  | 2887 (25.6)  |                  |
|                                             | >=30                | 66 (17.7)   | 1460 (13.0)  |                  |
| <b>Age at menarche</b>                      |                     | 12.8 (1.6)  | 12.9 (1.6)   | 0.151            |
| <b>Previous pregnancy</b>                   | No                  | 68 (17.9)   | 1641 (15.0)  | 0.13             |
|                                             | Yes                 | 311 (82.1)  | 9316 (85.0)  |                  |
| <b>Menopausal status</b>                    | Premenopausal       | 115 (29.9)  | 4309 (30.0)  | 1                |
|                                             | Postmenopausal      | 270 (70.1)  | 10053 (70.0) |                  |
| <b>Age at menopause</b>                     |                     | 50.8 (4.6)  | 50.5 (4.3)   | 0.249            |
| <b>Hormone replacement therapy</b>          | HRT                 | 93 (48.4)   | 2507 (51.2)  | 0.504            |
|                                             | No HRT              | 99 (51.6)   | 2393 (48.8)  |                  |
| <b>Familial history breast / ov. cancer</b> | No                  | 125 (40.6)  | 3710 (44.2)  | 0.23             |
|                                             | Yes                 | 183 (59.4)  | 4682 (55.8)  |                  |
| <b>BRCA mutation</b>                        | No                  | 51 (12.6)   | 2381 (13.9)  | <b>&lt;0.001</b> |
|                                             | Yes                 | 65 (16.1)   | 1353 (7.9)   |                  |
|                                             | NA                  | 288 (71.3)  | 13437 (78.3) |                  |
| <b>First treatment</b>                      | Chemotherapy        | 57 (14.1)   | 1739 (10.1)  | <b>0.002</b>     |
|                                             | NET / NRT / other   | 21 (5.2)    | 556 (3.2)    |                  |
|                                             | Surgery             | 326 (80.7)  | 14876 (86.6) |                  |
| <b>Chemotherapy</b>                         | No                  | 216 (53.5)  | 10264 (59.8) | <b>0.012</b>     |
|                                             | Yes                 | 188 (46.5)  | 6907 (40.2)  |                  |
| <b>Chemotherapy regimen</b>                 | Anthra-taxanes      | 153 (37.9)  | 5124 (29.8)  | <b>0.01</b>      |
|                                             | Anthracyclines      | 27 (6.7)    | 1296 (7.5)   |                  |
|                                             | Others              | 0 (0.0)     | 51 (0.3)     |                  |
|                                             | Taxanes             | 8 (2.0)     | 435 (2.5)    |                  |
| <b>Endocrine therapy</b>                    | No                  | 101 (25.0)  | 6864 (40.0)  | <b>&lt;0.001</b> |
|                                             | Yes                 | 303 (75.0)  | 10307 (60.0) |                  |
| <b>Endocrine therapy type</b>               | Aromatase inhibitor | 234 (57.9)  | 6761 (39.4)  | <b>&lt;0.001</b> |
|                                             | LH RH agonists      | 3 (0.7)     | 71 (0.4)     |                  |
|                                             | Others              | 0 (0.0)     | 4 (0.0)      |                  |
|                                             | Tamoxifen           | 66 (16.3)   | 3471 (20.2)  |                  |
| <b>Targeted therapy</b>                     | No                  | 374 (92.6)  | 15635 (91.1) | 0.331            |
|                                             | Yes                 | 30 (7.4)    | 1536 (8.9)   |                  |
| <b>Targeted therapy type</b>                | Bevacizumab         | 0 (0.0)     | 47 (0.3)     | 0.618            |
|                                             | Lapatinib           | 0 (0.0)     | 3 (0.0)      |                  |
|                                             | Trastuzumab         | 30 (7.4)    | 1455 (8.5)   |                  |
| <b>Radiotherapy</b>                         | No                  | 78 (19.3)   | 2335 (13.6)  | <b>0.001</b>     |
|                                             | Yes                 | 326 (80.7)  | 14836 (86.4) |                  |

| Tumor level                 | n                    | 808         | 17382        |                  |
|-----------------------------|----------------------|-------------|--------------|------------------|
| Diagnostic modality         | Non-palpable         | 498 (64.3)  | 7149 (61.8)  | 0.189            |
|                             | Palpable             | 277 (35.7)  | 4415 (38.2)  |                  |
| Clinical size               |                      | 31.1 (21.0) | 27.9 (20.2)  | <b>0.002</b>     |
| Clinical T stage            | T0 or pIis           | 373 (46.6)  | 4681 (27.7)  | <b>&lt;0.001</b> |
|                             | T1                   | 201 (25.1)  | 7206 (42.6)  |                  |
|                             | T2                   | 169 (21.1)  | 3838 (22.7)  |                  |
|                             | T3                   | 34 (4.2)    | 779 (4.6)    |                  |
|                             | T4                   | 23 (2.9)    | 414 (2.4)    |                  |
| Clinical N stage            | cN0                  | 720 (89.3)  | 15187 (87.5) | 0.139            |
|                             | cN1/N2/N3            | 86 (10.7)   | 2168 (12.5)  |                  |
| Pathological T stage        | pT0 or pIis          | 95 (14.4)   | 1995 (13.4)  | 0.519            |
|                             | pT1                  | 413 (62.6)  | 9680 (64.8)  |                  |
|                             | pT2                  | 136 (20.6)  | 2986 (20.0)  |                  |
|                             | pT3/T4               | 16 (2.4)    | 275 (1.8)    |                  |
| BC subtype                  | luminal              | 583 (86.2)  | 11410 (77.5) | <b>&lt;0.001</b> |
|                             | TNBC                 | 52 (7.7)    | 1630 (11.1)  |                  |
|                             | HER2+                | 41 (6.1)    | 1677 (11.4)  |                  |
| ER status                   | negative             | 70 (10.2)   | 2503 (16.8)  | <b>&lt;0.001</b> |
|                             | positive             | 618 (89.8)  | 12411 (83.2) |                  |
| PR status                   | negative             | 170 (25.6)  | 4677 (33.0)  | <b>&lt;0.001</b> |
|                             | positive             | 494 (74.4)  | 9500 (67.0)  |                  |
| HER2 status                 | negative             | 635 (93.9)  | 13061 (88.6) | <b>&lt;0.001</b> |
|                             | positive             | 41 (6.1)    | 1677 (11.4)  |                  |
| Percentage of ER positivity |                      | 77.8 (31.1) | 70.8 (36.3)  | <b>&lt;0.001</b> |
| Percentage of PR positivity |                      | 49.9 (38.7) | 43.9 (38.8)  | <b>&lt;0.001</b> |
| Invasive or DCIS            | DCIS only            | 96 (14.5)   | 1955 (13.0)  | 0.269            |
|                             | Invasive carcinoma   | 565 (85.5)  | 13123 (87.0) |                  |
| DCIS component              | DCIS                 | 474 (69.5)  | 6940 (68.8)  | 0.726            |
|                             | No DCIS              | 208 (30.5)  | 3150 (31.2)  |                  |
| Multifocality               | No / NA              | 594 (73.5)  | 13791 (79.3) | <b>&lt;0.001</b> |
|                             | Yes                  | 214 (26.5)  | 3591 (20.7)  |                  |
| pN status                   | 0                    | 577 (71.4)  | 12504 (71.9) | 0.736            |
|                             | [1-3]                | 162 (20.0)  | 3525 (20.3)  |                  |
|                             | 4 and more           | 69 (8.5)    | 1353 (7.8)   |                  |
| Grade                       | 1                    | 196 (28.6)  | 3473 (23.7)  | <b>&lt;0.001</b> |
|                             | 2                    | 346 (50.5)  | 6877 (46.9)  |                  |
|                             | 3                    | 143 (20.9)  | 4309 (29.4)  |                  |
|                             |                      |             |              |                  |
| LVI                         | No                   | 425 (78.8)  | 8781 (71.6)  | <b>&lt;0.001</b> |
|                             | Yes                  | 114 (21.2)  | 3482 (28.4)  |                  |
| Histological type           | NST                  | 517 (64.4)  | 12047 (69.6) | <b>&lt;0.001</b> |
|                             | lobular              | 122 (15.2)  | 2068 (12.0)  |                  |
|                             | mixed                | 24 (3.0)    | 105 (0.6)    |                  |
|                             | others               | 140 (17.4)  | 3079 (17.8)  |                  |
| Breast surgery              | Lumpectomy           | 479 (59.3)  | 11767 (67.7) | <b>&lt;0.001</b> |
|                             | Mastectomy           | 321 (39.7)  | 5325 (30.6)  |                  |
|                             | No surgery           | 8 (1.0)     | 290 (1.7)    |                  |
| Axillar surgery             | AND                  | 419 (52.2)  | 10476 (63.2) | <b>&lt;0.001</b> |
|                             | SND                  | 303 (37.8)  | 5039 (30.4)  |                  |
|                             | No axillary sampling | 80 (10.0)   | 1068 (6.4)   |                  |

Missing data: Age, n=2; Age class, n=2; BMI, n=5943; BMI class, n=5943; BMI class, n=5943; Age at menarche, n=7543; Previous pregnancy, n=6239; Menopausal status, n=2828; Age at menopause, n=9428; Hormone replacement therapy, n=12483; Familial history breast / ov. cancer, n=8875; Research hereditary predisposition, n=13725; BRCA mutation, n=16178; Targeted therapy type, n=31; Diagnostic modality, n=5851; clinical size, n=8481; clinical T stage, n=472; clinical N stage, n=29; pathological T stage, n=2594; breast cancer subtype, n=2797; ER status, n=2588; PR status, n=3349; HER2 status, n=2776; percentage of ER positivity, n=2675; percentage of PR positivity, n=3420; Invasive or DCIS, n=2451; DCIS component, n=7418; histological size, n=5221; grade, n=2846; lymphovascular invasion, n=5388; histological type, n=88; axillar surgery, n=805. Statistical tests were chi-square tests for categorical variables and t-tests or anova tests for quantitative variables, all tests were two-sided. Exact p-values for BMI, BRCA mutation, Endocrine therapy, Endocrine therapy type, Clinical T stage, BC subtype, ER status, PR status, HER2 status, Percentage of ER positivity, Percentage of PR positivity, Multifocality, Grade, LVI, Histological type, Breast surgery, Axillar surgery are 0.00019, 2.08E-05, 1.63E-09, 2.27E-12, 2.20E-16, 3.89E-07, 6.36E-06, 8.67E-05, 2.33E-05, 5.10E-07, 0.00012, 8.29E-05, 4.13E-06, 0.0003, 2.80E-15, 2.00E-07, 5.44E-10. Abbreviations: AND, axillary lymph node dissection; BMI, body mass index; DCIS, ductal carcinoma in situ; ER, estrogen receptor; LVI, lymphovascular invasion; NET, neoadjuvant endocrine therapy; NRT, neoadjuvant radiotherapy; NST, no special type; PR, progesterone receptor; SND, sentinel lymph node dissection; TNBC: triple negative breast cancer. "n" denotes the number of patients. Categorical variables are expressed as absolute numbers (percentages in brackets). Continuous variables are expressed as mean values, with the standard deviation in brackets.

Supplementary Table 2: Patient's and tumor characteristics of the cohort of 313 patients with invasive sBBCs.

|                                             | level                       | n           |
|---------------------------------------------|-----------------------------|-------------|
| <b>Patient level</b>                        |                             | 313         |
| <b>Age</b>                                  |                             | 60.8 (12.8) |
| <b>Age class</b>                            | <40                         | 13 (4.2)    |
|                                             | [40-50[                     | 56 (17.9)   |
|                                             | [50-60[                     | 81 (26.0)   |
|                                             | [60-70[                     | 86 (27.6)   |
|                                             | >=70                        | 76 (24.4)   |
| <b>BMI</b>                                  |                             | 25.9 (5.1)  |
| <b>BMI class</b>                            | <18.5                       | 7 (2.4)     |
|                                             | 18.5-24.9                   | 147 (49.8)  |
|                                             | 25-29.9                     | 83 (28.1)   |
|                                             | >=30                        | 58 (19.7)   |
| <b>Previous pregnancy</b>                   | No                          | 50 (16.8)   |
|                                             | Yes                         | 248 (83.2)  |
| <b>Menopausal status</b>                    | Premenopausal               | 89 (29.7)   |
|                                             | Postmenopausal              | 211 (70.3)  |
| <b>Familial history breast / ov. cancer</b> | No                          | 101 (42.3)  |
|                                             | Yes                         | 138 (57.7)  |
| <b>Research hereditary predisposition</b>   | No                          | 40 (44.4)   |
|                                             | Yes                         | 50 (55.6)   |
| <b>BRCA mutation</b>                        | No                          | 37 (74.0)   |
|                                             | Yes                         | 13 (26.0)   |
| <b>First treatment</b>                      | Chemotherapy                | 52 (16.6)   |
|                                             | NET / NRT / other           | 21 (6.7)    |
|                                             | Surgery                     | 240 (76.7)  |
| <b>Chemotherapy</b>                         | No                          | 146 (46.6)  |
|                                             | Yes                         | 167 (53.4)  |
|                                             | <i>Chemotherapy regimen</i> |             |
|                                             | <i>Anthra-taxanes</i>       | 138 (44.1)  |
|                                             | <i>Anthracyclines</i>       | 22 (7.0)    |
|                                             | <i>Taxanes</i>              | 7 (2.2)     |
| <b>Endocrine therapy</b>                    | No                          | 39 (12.5)   |
|                                             | Yes                         | 274 (87.5)  |
| <b>Targeted therapy</b>                     | No                          | 286 (91.4)  |
|                                             | Yes                         | 27 (8.6)    |
| <b>Radiotherapy</b>                         | No                          | 52 (16.6)   |
|                                             | Yes                         | 261 (83.4)  |
| <b>Tumor level</b>                          |                             | 626         |
| <b>Diagnostic modality</b>                  | Non-palpable                | 355 (59.1)  |
|                                             | Palpable                    | 246 (40.9)  |
| <b>Clinical size</b>                        |                             | 31.4 (21.6) |
| <b>Clinical T stage</b>                     | T0 or pTis                  | 248 (39.9)  |
|                                             | T1                          | 173 (27.9)  |
|                                             | T2                          | 147 (23.7)  |
|                                             | T3                          | 31 (5.0)    |
|                                             | T4                          | 22 (3.5)    |
| <b>Clinical N stage</b>                     | cN0                         | 552 (88.5)  |
|                                             | cN1/N2/N3                   | 72 (11.5)   |

|                                  |                      |             |
|----------------------------------|----------------------|-------------|
| <b>Pathological T stage</b>      | pT1                  | 357 (73.8)  |
|                                  | pT2                  | 111 (22.9)  |
|                                  | pT3                  | 15 (3.1)    |
|                                  | pT4                  | 1 (0.2)     |
| <b>BC subtype</b>                | luminal              | 538 (87.6)  |
|                                  | TNBC                 | 44 (7.2)    |
|                                  | <i>HER2+</i>         | 32 (5.2)    |
| <b>ER status</b>                 | negative             | 56 (9.1)    |
|                                  | positive             | 562 (90.9)  |
| <b>PR status</b>                 | negative             | 145 (24.3)  |
|                                  | positive             | 452 (75.7)  |
| <b><i>HER2</i> status</b>        | negative             | 582 (94.8)  |
|                                  | positive             | 32 (5.2)    |
| <b>ER positivity (intensity)</b> | +                    | 41 (7.5)    |
|                                  | ++                   | 156 (28.4)  |
|                                  | +++                  | 352 (64.1)  |
| <b>ER positivity (%)</b>         |                      | 78.2 (30.6) |
| <b>PR positivity (intensity)</b> | +                    | 58 (12.2)   |
|                                  | ++                   | 149 (31.3)  |
|                                  | +++                  | 269 (56.5)  |
| <b>PR positivity (%)</b>         |                      | 51.2 (38.6) |
| <b>DCIS component</b>            | DCIS                 | 414 (68.2)  |
|                                  | No DCIS              | 193 (31.8)  |
| <b>Histological size</b>         |                      | 17.6 (13.0) |
| <b>pN status</b>                 | 0                    | 329 (67.6)  |
|                                  | [1-3]                | 111 (22.8)  |
|                                  | 4 and more           | 47 (9.7)    |
| <b>Grade</b>                     | 1                    | 181 (29.8)  |
|                                  | 2                    | 311 (51.2)  |
|                                  | 3                    | 116 (19.1)  |
| <b>Lymphovascular invasion</b>   | No                   | 376 (80.0)  |
|                                  | Yes                  | 94 (20.0)   |
| <b>Histological type</b>         | lobular              | 114 (18.4)  |
|                                  | NST                  | 443 (71.3)  |
|                                  | others               | 64 (10.3)   |
| <b>Multifocality</b>             | No / NA              | 438 (70.0)  |
|                                  | Yes                  | 188 (30.0)  |
| <b>Breast surgery</b>            | Lumpectomy           | 359 (57.3)  |
|                                  | Mastectomy           | 259 (41.4)  |
|                                  | No surgery           | 8 (1.3)     |
| <b>Axillar surgery</b>           | AND                  | 359 (57.9)  |
|                                  | SND                  | 248 (40.0)  |
|                                  | No axillary sampling | 13 (2.1)    |

Missing data: Age, n=1; Age class, n=1; BMI, n=18; BMI class, n=18; Previous pregnancy, n=15; Menopausal status, n=13; Familial history breast / ov. cancer, n=74; Research hereditary predisposition, n=223; BRCA mutation, n=263

Diagnostic modality, n=25; clinical size, n=288; clinical T stage, n=5; clinical N stage, n=2; pathological T stage, n=142; breast cancer subtype, n=12; ER status, n=8; PR status, n=29; *HER2* status, n=12; intensity of ER positivity, n=77; percentage of ER positivity, n=16; intensity of PR positivity, n=150; percentage of PR positivity, n=37; DCIS component, n=19; pN status, n=139; grade, n=45; lymphovascular invasion, n=156; histological type, n=5; axillar surgery, n=6.

Abbreviations: DCIS, ductal carcinoma in situ; ER, estrogen receptor; NET, neoadjuvant endocrine therapy; NRT, neoadjuvant radiotherapy; NST, no special type; PR, progesterone receptor; SND, sentinel lymph node dissection; TNBC: triple negative breast cancer. "n" denotes the number of patients. Categorical variables are expressed as absolute numbers (percentages in brackets). Continuous variables are expressed as mean values, with the standard deviation in brackets.

Supplementary Table 3 : Patient's and tumor characteristics according to the presence of a germline genetic predisposition

|                              |                | Overall     | Germline genetic predisposition | No genetic predisposition | <i>p</i>         |
|------------------------------|----------------|-------------|---------------------------------|---------------------------|------------------|
| <b>Patient level</b>         |                | 313         | 13 (4.2)                        | 37 (11.8)                 |                  |
| <b>Age</b>                   |                | 60.8 (12.8) | 43.6 (8.2)                      | 50.8 (8.8)                | <b>0.012</b>     |
| <b>BMI class</b>             | 18.5-24.9      | 147 (49.8)  | 5 (41.7)                        | 19 (52.8)                 | NaN              |
|                              | <18.5          | 7 (2.4)     | 0 (0.0)                         | 0 (0.0)                   |                  |
|                              | 25-29.9        | 83 (28.1)   | 6 (50.0)                        | 13 (36.1)                 |                  |
|                              | >=30           | 58 (19.7)   | 1 (8.3)                         | 4 (11.1)                  |                  |
| <b>Previous pregnancy</b>    | No             | 50 (16.8)   | 4 (30.8)                        | 6 (16.2)                  | 0.468            |
|                              | Yes            | 248 (83.2)  | 9 (69.2)                        | 31 (83.8)                 |                  |
| <b>Menopausal status</b>     | Premenopausal  | 89 (29.7)   | 11 (84.6)                       | 23 (63.9)                 | 0.299            |
|                              | Postmenopausal | 211 (70.3)  | 2 (15.4)                        | 13 (36.1)                 |                  |
| <b>Tumor level</b>           |                | 626         | 26 (4.2)                        | 74 (11.8)                 |                  |
|                              |                | 626         | 26 (4.2)                        | 74 (11.8)                 |                  |
| <b>Diagnostic modality</b>   | Non-palpable   | 355 (59.1)  | 8 (33.3)                        | 45 (62.5)                 | <b>0.024</b>     |
|                              | Palpable       | 246 (40.9)  | 16 (66.7)                       | 27 (37.5)                 |                  |
| <b>Clinical T stage</b>      | T0 or pTis     | 248 (39.9)  | 8 (30.8)                        | 35 (47.9)                 | <b>0.033</b>     |
|                              | T1             | 173 (27.9)  | 4 (15.4)                        | 22 (30.1)                 |                  |
|                              | T2             | 147 (23.7)  | 12 (46.2)                       | 12 (16.4)                 |                  |
|                              | T3             | 31 (5.0)    | 1 (3.8)                         | 1 (1.4)                   |                  |
|                              | T4             | 22 (3.5)    | 1 (3.8)                         | 3 (4.1)                   |                  |
| <b>Clinical N stage</b>      | cN0            | 552 (88.5)  | 19 (73.1)                       | 64 (86.5)                 | 0.207            |
|                              | cN1/N2/N3      | 72 (11.5)   | 7 (26.9)                        | 10 (13.5)                 |                  |
| <b>BC subtype</b>            | luminal        | 538 (87.6)  | 11 (44.0)                       | 61 (83.6)                 | <b>&lt;0.001</b> |
|                              | TNBC           | 44 (7.2)    | 14 (56.0)                       | 5 (6.8)                   |                  |
|                              | HER2+          | 32 (5.2)    | 0 (0.0)                         | 7 (9.6)                   |                  |
| <b>Concordance</b>           | Concordant     | 512 (84.8)  | 22 (91.7)                       | 52 (72.2)                 | 0.092            |
|                              | Discordant     | 92 (15.2)   | 2 (8.3)                         | 20 (27.8)                 |                  |
| <b>DCIS component</b>        | DCIS           | 414 (68.2)  | 15 (60.0)                       | 53 (73.6)                 | 0.304            |
|                              | No DCIS        | 193 (31.8)  | 10 (40.0)                       | 19 (26.4)                 |                  |
| <b>Tumor cellularity (%)</b> |                | 65.8 (17.2) | 72.9 (12.0)                     | 64.2 (19.3)               | 0.137            |
| <b>Tumor grade</b>           | 1              | 181 (29.8)  | 1 (4.2)                         | 19 (25.7)                 | <b>&lt;0.001</b> |
|                              | 2              | 311 (51.2)  | 7 (29.2)                        | 38 (51.4)                 |                  |
|                              | 3              | 116 (19.1)  | 16 (66.7)                       | 17 (23.0)                 |                  |
| <b>Intratumoral TILs (%)</b> |                | 6.5 (7.6)   | 11.9 (11.1)                     | 8.0 (7.4)                 | 0.19             |
| <b>Str TILs (%)</b>          |                | 13.3 (12.5) | 16.9 (14.1)                     | 15.5 (12.5)               | 0.75             |
| <b>Histological type</b>     | lobular        | 114 (18.4)  | 1 (3.8)                         | 10 (13.5)                 | 0.365            |
|                              | NST            | 443 (71.3)  | 23 (88.5)                       | 57 (77.0)                 |                  |
|                              | others         | 64 (10.3)   | 2 (7.7)                         | 7 (9.5)                   |                  |
| <b>Multifocality</b>         | No / NA        | 438 (70.0)  | 18 (69.2)                       | 46 (62.2)                 | 0.683            |
|                              | Yes            | 188 (30.0)  | 8 (30.8)                        | 28 (37.8)                 |                  |

Statistical tests were chi-square tests or fisher tests when indicated for categorical variables and Wilcoxon-tests or Kruskal-Wallis for quantitative variables. All tests were two sided. Exact p-values for the variables breast cancer subtype and tumor grade are 3.795e-07 and 0.0003 respectively. "n" denotes the number of patients. Categorical variables are expressed as absolute numbers (percentages in brackets). Continuous variables are expressed as mean values, with the standard deviation in brackets.

Supplementary Table 4 : Concordance between left and right tumor's characteristics.

|                           | concordance | Kappa | <i>p</i>         | Kendall | <i>p</i>         |
|---------------------------|-------------|-------|------------------|---------|------------------|
| Diagnostic modality       | 62.5        | 0.23  | <b>&lt;0.001</b> |         |                  |
| Clinical size             |             |       |                  | 0.73    | <b>&lt;0.001</b> |
| Clinical T stage          | 39.5        | 0.14  | <b>&lt;0.001</b> |         |                  |
| Clinical N stage          | 83          | 0.16  | 0.08             |         |                  |
| Pathological T stage      | 62.1        | 0.06  | 0.21             |         |                  |
| BC subtype                | 84.8        | 0.32  | <b>&lt;0.001</b> |         |                  |
| ER status                 | 91.1        | 0.46  | <b>&lt;0.001</b> |         |                  |
| PR status                 | 74.7        | 0.31  | <b>&lt;0.001</b> |         |                  |
| HER2 status               | 90.7        | 0.08  | 0.33             |         |                  |
| ER positivity (intensity) | 65.2        | 0.29  | <b>&lt;0.001</b> |         |                  |
| ER positivity (%)         |             |       |                  | 0.71    | <b>&lt;0.001</b> |
| PR positivity (intensity) | 55.7        | 0.21  | <b>&lt;0.001</b> |         |                  |
| PR positivity (%)         |             |       |                  | 0.68    | <b>&lt;0.001</b> |
| Intratumoral TILs (%)     |             |       |                  | 0.69    | <b>&lt;0.001</b> |
| Str TILs (%)              |             |       |                  | 0.67    | <b>&lt;0.001</b> |
| DCIS component            | 69.7        | 0.3   | <b>&lt;0.001</b> |         |                  |
| pN status                 | 52.7        | 0.02  | 0.4              |         |                  |
| Grade                     | 48.3        | 0.15  | <b>&lt;0.001</b> |         |                  |
| Lymphovascular invasion   | 73.7        | 0.17  | <b>0.04</b>      |         |                  |
| Histological type         | 62.8        | 0.17  | <b>&lt;0.001</b> |         |                  |
| Multifocality             | 62.3        | 0.1   | 0.06             |         |                  |
| Breast surgery            | 68.4        | 0.37  | <b>&lt;0.001</b> |         |                  |
| Axillar surgery           | 54.8        | 0.1   | <b>0.03</b>      |         |                  |

Abbreviations: BMI, body mass index; DCIS, ductal carcinoma in situ; ER, estrogen receptor; intratumoral TIL, intratumoral tumor infiltrating lymphocytes; PR, progesterone receptor; str TIL, stromal tumor infiltrating lymphocytes; TNBC: triple negative breast cancer. In case of categorical variables, the kappa coefficient was computed as a measure of concordance between the left and the right side; otherwise in case of numeric or integer variables, the kendall test was used. The exact p-values for the test for the variables Clinical T stage, BC subtype, ER status, PR status, ER positivity (intensity), PR positivity (intensity), DCIS component, Grade, Histological type, Breast surgery are  $p=7.6e-05$ ,  $p=7.07e-05$ ,  $p=0.001$ ,  $p=0.0002$ ,  $p=2.4e-05$ ,  $p=3.5e-06$ ,  $p=0.0003$ ,  $P=2.7e-06$ ,  $p=0.0006$ ,  $p=0.0004$ ,  $p=2.2e-11$  respectively. The exact p-values for the variables Clinical size, ER positivity (%), PR positivity (%), Intratumoral TILs (%), Str TILs (%) are  $p=1.4e-06$ ,  $p=1,2e-14$ ,  $p=3,9e-10$ ,  $p=1,4e-05$ ,  $p=0,0001$  respectively.



Supplementary Table 5: Association between patient's tumor's characteristics and immune infiltration (stromal TIL levels), univariate and multivariate analysis.

| Variable                                | levels             | Str TILs |      |        |                  | Univariate            |                   | Multivariate       |                  |
|-----------------------------------------|--------------------|----------|------|--------|------------------|-----------------------|-------------------|--------------------|------------------|
|                                         |                    | n        | mean | median | p                | exp(Beta) [95% CI]    | p-value           | exp(Beta) [95% CI] | p-value          |
| <b>Age class</b>                        | <40                | 9        | 23.9 | 25     | <b>0.017</b>     | 1                     | 0.14              |                    |                  |
|                                         | [40-50[            | 46       | 13   | 10     |                  | -10.85 [-19.77--1.93] |                   |                    |                  |
|                                         | [50-60[            | 76       | 13.5 | 10     |                  | -10.38 [-19--1.75]    |                   |                    |                  |
|                                         | [60-70[            | 80       | 12.5 | 10     |                  | -11.35 [-19.96--2.75] |                   |                    |                  |
|                                         | >=70               | 64       | 12.6 | 10     |                  | -11.28 [-19.99--2.57] |                   |                    |                  |
| <b>BMI class</b>                        | 18.5-24.9          | 137      | 14.6 | 10     | 0.776            | 1                     | 0.41              |                    |                  |
|                                         | <18.5              | 6        | 12.5 | 10     |                  | -2.08 [-12.37-8.22]   |                   |                    |                  |
|                                         | 25-29.9            | 80       | 12.8 | 10     |                  | -1.78 [-5.25-1.7]     |                   |                    |                  |
|                                         | >=30               | 50       | 11.2 | 10     |                  | -3.36 [-7.44-0.72]    |                   |                    |                  |
| <b>Menopausal status</b>                | Premenopausal      | 77       | 14.5 | 10     | 0.137            | 1                     | 0.2               |                    |                  |
|                                         | Postmenopausal     | 187      | 12.3 | 10     |                  | -2.16 [-5.43-1.11]    |                   |                    |                  |
| <b>BRCA mutation</b>                    | No                 | 26       | 15.5 | 10     | 0.823            | 1                     | 0.75              |                    |                  |
|                                         | Yes                | 16       | 16.9 | 10     |                  | 1.34 [-6.83-9.51]     |                   |                    |                  |
| <b>Diagnostic modality</b>              | Non-palpable       | 166      | 11.2 | 10     | <b>0.006</b>     | 1                     | <b>0.00072</b>    | 1                  | <b>0.04</b>      |
|                                         | Palpable           | 111      | 16.4 | 10     |                  | 5.1 [2.15-8.06]       |                   | 3.04 [0.14 - 5.95] |                  |
| <b>Clinical T stage</b>                 | T0 or pTis         | 105      | 11.4 | 10     | 0.259            | 1                     | 0.11              |                    |                  |
|                                         | T1                 | 72       | 13.4 | 10     |                  | 2.01 [-1.74-5.77]     |                   |                    |                  |
|                                         | T2                 | 67       | 16.3 | 10     |                  | 4.86 [1.03-8.7]       |                   |                    |                  |
|                                         | T3                 | 16       | 15.8 | 10     |                  | 4.39 [-2.19-10.98]    |                   |                    |                  |
|                                         | T4                 | 13       | 10.4 | 5      |                  | -1.03 [-8.25-6.18]    |                   |                    |                  |
| <b>Clinical N stage</b>                 | cN0                | 242      | 12.5 | 10     | 0.114            | 1                     | <b>0.0019</b>     |                    |                  |
|                                         | cN1/N2/N3          | 34       | 19.5 | 15     |                  | 7.05 [2.61-11.48]     |                   |                    |                  |
| <b>Pathological T stage</b>             | pT1                | 149      | 11   | 10     | 0.081            | 1                     | <b>0.0026</b>     |                    |                  |
|                                         | pT2                | 49       | 18   | 10     |                  | 7.06 [3.27-10.85]     |                   |                    |                  |
|                                         | pT3                | 4        | 8.7  | 7.5    |                  | -2.23 [-13.88-9.42]   |                   |                    |                  |
|                                         | pT4                | 1        | 5    | 5      |                  | -5.98 [-29.05-17.09]  |                   |                    |                  |
| <b>DCIS component</b>                   | DCIS               | 180      | 12.4 | 10     | 0.687            | 1                     | 0.14              |                    |                  |
|                                         | No DCIS            | 96       | 14.8 | 10     |                  | 2.35 [-0.75-5.45]     |                   |                    |                  |
| <b>Tumor cellularity (%)</b>            |                    |          |      |        |                  | 0.1 [0.01-0.19]       | <b>0.022</b>      |                    |                  |
| <b>pN status</b>                        | 0                  | 146      | 11.1 | 10     | <b>&lt;0.001</b> | 1                     | <b>&lt;0.0001</b> |                    |                  |
|                                         | [1-3]              | 41       | 13.1 | 10     |                  | 2.02 [-1.95-5.99]     |                   |                    |                  |
|                                         | 4 and more         | 16       | 25.6 | 22.5   |                  | 14.57 [8.65-20.49]    |                   |                    |                  |
| <b>Grade</b>                            | 1                  | 78       | 9.1  | 10     | <b>&lt;0.001</b> | 1                     | <b>&lt;0.0001</b> | 1                  | <b>&lt;0.001</b> |
|                                         | 2                  | 138      | 11.9 | 10     |                  | 2.82 [-0.41-6.05]     |                   | 2.08 [-1.17- 5.33] |                  |
|                                         | 3                  | 58       | 22.4 | 17.5   |                  | 13.38 [9.43-17.33]    |                   | 10.6 [6.36 - 14.8] |                  |
| <b>Lymphovascular invasion</b>          | No                 | 156      | 11   | 10     | <b>&lt;0.001</b> | 1                     | <b>0.00075</b>    |                    |                  |
|                                         | Yes                | 40       | 17.8 | 15     |                  | 6.71 [2.81-10.61]     |                   |                    |                  |
| <b>Histological type</b>                | lobular            | 49       | 10.3 | 5      | <b>0.021</b>     | 1                     | 0.13              |                    |                  |
|                                         | NST                | 205      | 14.2 | 10     |                  | 3.82 [-0.07-7.72]     |                   |                    |                  |
|                                         | others             | 23       | 11.7 | 5      |                  | 1.39 [-4.8-7.58]      |                   |                    |                  |
| <b>Multifocality</b>                    | No / NA            | 190      | 13.5 | 10     | 0.71             | 1                     | 0.62              |                    |                  |
|                                         | Yes                | 87       | 12.7 | 10     |                  | -0.81 [-4-2.37]       |                   |                    |                  |
| <b>BC subtype</b>                       | luminal            | 240      | 11.8 | 10     | <b>&lt;0.001</b> | 1                     | <b>&lt;0.0001</b> |                    |                  |
|                                         | TNBC               | 17       | 22.9 | 20     |                  | 11.1 [5.21-16.98]     |                   |                    |                  |
|                                         | HER2+              | 16       | 23.9 | 17.5   |                  | 12.03 [5.97-18.09]    |                   |                    |                  |
| <b>Concordance BC subtype</b>           | Concordant         | 226      | 11.8 | 10     | <b>&lt;0.001</b> | 1                     | <b>&lt;0.0001</b> | 1                  | <b>0.002</b>     |
|                                         | Discordant         | 45       | 20.9 | 15     |                  | 9.06 [5.19-12.93]     |                   | 6.07 [2.23 - 9.90] |                  |
| <i>Interaction concordance /subtype</i> |                    |          |      |        |                  | 1                     | 0.6               |                    |                  |
|                                         | Discordant * TNBC  |          |      |        |                  | -1.71 [-14.7, 11.3]   |                   |                    |                  |
|                                         | Discordant * HER2+ |          |      |        |                  | -7.76 [-22.3, 6.78]   |                   |                    |                  |

Abbreviations: BMI, body mass index; DCIS, ductal carcinoma in situ; ER, estrogen receptor; NST, no special type; PR, progesterone receptor; TNBC: triple negative breast cancer. Statistical tests were Wilcoxon-tests/t-tests or anova/Kruskall Wallis tests when indicated, all tests were two sided. The exact p-values for the test for the variables pN status, grade, LVI, BC subtype, concordance, p= 1.58E-05, p= 2.33E-10, p= 0.0009, p= 2.51E-06, p=0.0003). In univariate analysis, exact p-values for nodal status, grade, BC subtype, concordance are: p: 2.76e-06, p= 1.79e-10, p= 2.506e-06, p= 6.71e-06 respectively. In multivariate analysis, exact p-values are grade: p= 1.29e-06 respectively.

Supplementary Table 6: Association between patient's tumor's characteristics and immune infiltration (intratumoral TIL levels), univariate and multivariate analysis.

| Variable                                | levels             | Intratumoral TILs |      |        |                  | Univariate            |                   | Multivariate         |                  |
|-----------------------------------------|--------------------|-------------------|------|--------|------------------|-----------------------|-------------------|----------------------|------------------|
|                                         |                    | n                 | mean | median | p                | OR                    | p-value           | exp(Beta) [95% CI]   | p-value          |
| <b>Age class</b>                        | <40                | 9                 | 16.3 | 15     | <b>0.011</b>     | 1                     | <b>0.0016</b>     |                      |                  |
|                                         | [40-50[            | 44                | 6.2  | 3      |                  | -10.17 [-15.51--4.84] |                   |                      |                  |
|                                         | [50-60[            | 76                | 6.6  | 5      |                  | -9.69 [-14.83--4.54]  |                   |                      |                  |
|                                         | [60-70[            | 80                | 5.4  | 5      |                  | -10.88 [-16.01--5.75] |                   |                      |                  |
| <b>BMI class</b>                        | >=70               | 64                | 6.5  | 4      |                  | -9.85 [-15.04--4.65]  |                   |                      |                  |
|                                         | 18.5-24.9          | 137               | 7.1  | 5      | 0.688            | 1                     | 0.35              |                      |                  |
|                                         | <18.5              | 6                 | 5.7  | 5      |                  | -1.42 [-7.67-4.83]    |                   |                      |                  |
|                                         | 25-29.9            | 78                | 6.7  | 5      |                  | -0.42 [-2.55-1.7]     |                   |                      |                  |
| <b>Menopausal status</b>                | >=30               | 50                | 4.8  | 5      |                  | -2.25 [-4.72-0.23]    |                   |                      |                  |
|                                         | Premenopausal      | 75                | 7.3  | 5      | 0.204            | 1                     | 0.18              |                      |                  |
| <b>BRCA mutation</b>                    | Postmenopausal     | 187               | 5.9  | 5      |                  | -1.38 [-3.4-0.65]     |                   |                      |                  |
|                                         | No                 | 26                | 8    | 5      | 0.557            | 1                     | 0.18              |                      |                  |
| <b>Diagnostic modality</b>              | Yes                | 14                | 11.9 | 12.5   |                  | 3.93 [-1.84-9.69]     |                   |                      |                  |
|                                         | Non-palpable       | 165               | 5.1  | 3      | <b>0.003</b>     | 1                     | <b>0.00024</b>    |                      |                  |
| <b>Clinical T stage</b>                 | Palpable           | 110               | 8.5  | 5      |                  | 3.36 [1.57-5.16]      |                   |                      |                  |
|                                         | T0 or pTis         | 105               | 5.3  | 5      | 0.333            | 1                     | <b>0.039</b>      |                      |                  |
|                                         | T1                 | 72                | 6.2  | 5      |                  | 0.92 [-1.35-3.19]     |                   |                      |                  |
|                                         | T2                 | 65                | 8.8  | 5      |                  | 3.57 [1.23-5.91]      |                   |                      |                  |
|                                         | T3                 | 16                | 7.7  | 5      |                  | 2.41 [-1.57-6.39]     |                   |                      |                  |
| <b>Clinical N stage</b>                 | T4                 | 13                | 4.9  | 3      |                  | -0.35 [-4.71-4.01]    |                   |                      |                  |
|                                         | cN0                | 241               | 6.1  | 5      | 0.34             | 1                     | <b>0.023</b>      |                      |                  |
| <b>Pathological T stage</b>             | cN1/N2/N3          | 33                | 9.3  | 5      |                  | 3.2 [0.45-5.94]       |                   |                      |                  |
|                                         | pT1                | 149               | 5.3  | 5      | 0.082            | 1                     | <b>0.031</b>      |                      |                  |
|                                         | pT2                | 49                | 8.8  | 5      |                  | 3.47 [1.14-5.81]      |                   |                      |                  |
|                                         | pT3                | 4                 | 4.7  | 3.5    |                  | -0.55 [-7.73-6.62]    |                   |                      |                  |
| <b>DCIS component</b>                   | pT4                | 1                 | 3    | 3      |                  | -2.3 [-16.51-11.9]    |                   |                      |                  |
|                                         | DCIS               | 180               | 5.9  | 5      | 0.913            | 1                     | 0.1               |                      |                  |
| <b>Tumor cellularity (%)</b>            | No DCIS            | 94                | 7.5  | 5      |                  | 1.57 [-0.33-3.46]     |                   |                      |                  |
|                                         |                    |                   |      |        |                  | 0.07 [0.02-0.12]      | <b>0.011</b>      |                      |                  |
| <b>pN status</b>                        | 0                  | 146               | 5.4  | 3      | <b>&lt;0.001</b> | 1                     | <b>0.00035</b>    |                      |                  |
|                                         | [1-3]              | 41                | 6.2  | 5      |                  | 0.8 [-1.65-3.26]      |                   |                      |                  |
|                                         | 4 and more         | 16                | 12.8 | 10     |                  | 7.44 [3.78-11.1]      |                   |                      |                  |
| <b>Grade</b>                            | 1                  | 78                | 4.2  | 3      | <b>&lt;0.001</b> | 1                     | <b>&lt;0.0001</b> | 1                    | <b>&lt;0.001</b> |
|                                         | 2                  | 138               | 5.6  | 5      |                  | 1.47 [-0.51-3.44]     |                   | 1.02 [-0.89 - 2.94]  |                  |
|                                         | 3                  | 56                | 11.9 | 10     |                  | 7.76 [5.31-10.2]      |                   | 6.88 [4.29 - 9.46]   |                  |
| <b>Lymphovascular invasion</b>          | No                 | 156               | 5.4  | 3      | <b>&lt;0.001</b> | 1                     | <b>0.017</b>      |                      |                  |
|                                         | Yes                | 40                | 8.4  | 5      |                  | 2.95 [0.54-5.37]      |                   |                      |                  |
| <b>Histological type</b>                | lobular            | 49                | 5.2  | 2      | <b>0.02</b>      | 1                     | <b>0.39</b>       |                      |                  |
|                                         | NST                | 203               | 6.8  | 5      |                  | 1.65 [-0.72-4.03]     |                   |                      |                  |
|                                         | others             | 23                | 6.2  | 3      |                  | 1.05 [-2.72-4.82]     |                   |                      |                  |
| <b>Multifocality</b>                    | No / NA            | 189               | 6.8  | 5      | 0.723            | 1                     | 0.28              |                      |                  |
|                                         | Yes                | 86                | 5.7  | 5      |                  | -1.06 [-3-0.88]       |                   |                      |                  |
| <b>BC subtype</b>                       | luminal            | 240               | 5.7  | 5      | <b>&lt;0.001</b> | 1                     | <b>&lt;0.0001</b> | 1                    |                  |
|                                         | TNBC               | 15                | 12.7 | 10     |                  | 7.07 [3.29-10.85]     |                   | 13.3 [6.44 - 20.1]   | <b>&lt;0.001</b> |
|                                         | HER2+              | 16                | 11.8 | 10     |                  | 6.15 [2.48-9.82]      |                   | 5.47 [-1.27 - 12.2]  |                  |
| <b>Concordance BC subtype</b>           | Concordant         | 224               | 5.8  | 5      | <b>0.007</b>     | 1                     | <b>0.00095</b>    | 1                    | <b>0.028</b>     |
|                                         | Discordant         | 45                | 9.8  | 5      |                  | 4 [1.63-6.37]         |                   | 3.41 [0.37- 6.46]    |                  |
| <i>Interaction concordance /subtype</i> |                    |                   |      |        |                  | 1                     | <b>&lt;0.001</b>  | 1                    | <b>&lt;0.001</b> |
|                                         | Discordant * TNBC  |                   |      |        |                  | -16.9 [-25.7, -8.17]  |                   | -18.2 [-26.5- -9.85] |                  |
|                                         | Discordant * HER2+ |                   |      |        |                  | -3.51 [-12.2, 5.15]   |                   | -4.22 [-12.5- 4.04]  |                  |

Abbreviations: BMI, body mass index; DCIS, ductal carcinoma in situ; ER, estrogen receptor; NST, no special type; PR, progesterone receptor; TNBC: triple negative breast cancer. Statistical tests were Wilcoxon-tests/t-tests or anova/Kruskall Wallis tests when indicated, all tests were two sided. The exact p-values for the test for the variables pN status, grade, LVI, BC subtype, p= 0.0005, p= 2.22E-09, p= 0.0004, p= 1.71E-05). In univariate analysis, exact p-values for grade, BC subtype, interaction concordance\*subtype are p= 2.217e-09, p= 1.709e-05, p= 0.0007. In multivariate analysis, exact p-values for grade, BC subtype, interaction concordance\*subtype are: p= 3.31e-07, p= 0.0002, p=2.5e-05 respectively.

Supplemental Table 7: Association between patient's tumor's characteristics and pathological complete response (pCR), univariate and multivariate analysis.

| Variable name                            | Level          |     |     |        | Univariate |                 |                  | Multivariate |                  |              |
|------------------------------------------|----------------|-----|-----|--------|------------|-----------------|------------------|--------------|------------------|--------------|
|                                          |                | n=  | pCR | % pCR  | OR         | OR(95%)         | p                | OR           | OR(95%)          | p            |
| <b>Age class</b>                         | <40            | 12  | 6   | 50%    | 1          |                 |                  |              |                  |              |
|                                          | [40-50[        | 32  | 5   | 15.60% | 0.19       | [0.04 - 0.8]    | <b>0.026</b>     |              |                  |              |
|                                          | [50-60[        | 34  | 6   | 17.60% | 0.21       | [0.05 - 0.89]   | <b>0.035</b>     |              |                  |              |
|                                          | [60-70[        | 22  | 3   | 13.60% | 0.16       | [0.03 - 0.78]   | <b>0.03</b>      |              |                  |              |
|                                          | >=70           | 30  | 1   | 3.30%  | 0.03       | [0 - 0.25]      | <b>0.004</b>     |              |                  |              |
| <b>BMI class</b>                         | 18.5-24.9      | 61  | 9   | 15%    |            |                 |                  |              |                  |              |
|                                          | <18.5          | 0   | 0   | NaN %  |            |                 |                  |              |                  |              |
|                                          | 25-29.9        | 41  | 10  | 24%    |            |                 |                  |              |                  |              |
|                                          | >=30           | 30  | 3   | 10.00% |            |                 |                  |              |                  |              |
| <b>Previous pregnancy</b>                | No             | 12  | 3   | 25.00% | 1          |                 |                  |              |                  |              |
|                                          | Yes            | 117 | 19  | 16.20% | 0.58       | [0.16 - 2.8]    | 0.447            |              |                  |              |
| <b>Menopausal status</b>                 | Premenopausal  | 52  | 12  | 23.10% | 1          |                 |                  |              |                  |              |
|                                          | Postmenopausal | 78  | 10  | 12.80% | 0.49       | [0.19 - 1.24]   | 0.131            |              |                  |              |
| <b>BRCA mutation</b>                     | No             | 20  | 4   | 20%    | 1          |                 |                  |              |                  |              |
|                                          | Yes            | 12  | 7   | 58.30% | 5.6        | [1.21 - 30.31]  | <b>0.033</b>     |              |                  |              |
| <b>Diagnostic modality</b>               | Non-palpable   | 55  | 10  | 18.20% | 1          |                 |                  |              |                  |              |
|                                          | Palpable       | 73  | 12  | 16.40% | 0.89       | [0.35 - 2.27]   | 0.796            |              |                  |              |
| <b>Clinical T stage</b>                  | T0 or pTis     | 34  | 7   | 21%    | 1          |                 |                  |              |                  |              |
|                                          | T1             | 14  | 3   | 21%    | 1.05       | [0.2 - 4.59]    | 0.948            |              |                  |              |
|                                          | T2             | 48  | 7   | 14.60% | 0.66       | [0.2 - 2.13]    | 0.478            |              |                  |              |
|                                          | T3             | 17  | 3   | 18%    | 0.83       | [0.16 - 3.5]    | 0.803            |              |                  |              |
|                                          | T4             | 19  | 2   | 10.50% | 0.45       | [0.06 - 2.15]   | 0.358            |              |                  |              |
| <b>Clinical N stage</b>                  | cN0            | 100 | 17  | 17.00% | 1          |                 |                  |              |                  |              |
|                                          | cN1/N2/N3      | 31  | 5   | 16.10% | 0.94       | [0.29 - 2.64]   | 0.91             |              |                  |              |
| <b>DCIS component</b>                    | DCIS           | 35  | 6   | 17.10% | 1          |                 |                  |              |                  |              |
|                                          | No DCIS        | 90  | 16  | 17.80% | 1.05       | [0.39 - 3.15]   | 0.933            |              |                  |              |
| <b>Tumor cellularity</b>                 |                | 72  | 11  | 7.90%  |            |                 |                  |              |                  | 0.077        |
| <b>Tumor grade</b>                       | 1              | 18  | 1   | 5.60%  | 1          |                 |                  |              |                  |              |
|                                          | 2              | 61  | 7   | 11.50% | 2.2        | [0.36 - 42.72]  | 0.474            |              |                  |              |
|                                          | 3              | 43  | 13  | 30.20% | 7.37       | [1.29 - 139.66] | 0.065            |              |                  |              |
| <b>Intratumoral TILs (%)</b>             |                | 72  | 11  | 8%     | 1.08       | [1.01 - 1.16]   | <b>0.026</b>     |              |                  |              |
| <b>str TILs (%)</b>                      |                | 74  | 12  | 9%     | 1.06       | [1.01 - 1.1]    | <b>0.012</b>     | 1.05         | [ 1 - 1.1 ]      | <b>0.038</b> |
| <b>Histological type</b>                 | lobular        | 17  | 0   | 0%     |            |                 |                  |              |                  |              |
|                                          | NST            | 102 | 21  | 20.60% |            |                 |                  |              |                  |              |
|                                          | others         | 8   | 1   | 13%    |            |                 |                  |              |                  |              |
| <b>Multifocality</b>                     | No / NA        | 103 | 14  | 13.60% | 1          |                 |                  |              |                  |              |
|                                          | Yes            | 29  | 8   | 28%    | 2.42       | [0.87 - 6.45]   | 0.08             |              |                  |              |
| <b>BC subtype</b>                        | luminal        | 92  | 8   | 8.70%  | 1          |                 |                  | 1            |                  |              |
|                                          | TNBC           | 27  | 11  | 40.70% | 7.22       | [2.55 - 21.51]  | <b>&lt;0.001</b> | 10.2         | [ 1.32 - 88.86 ] | <b>0.026</b> |
|                                          | HER2+          | 9   | 3   | 33.30% | 5.25       | [0.97 - 24.43]  | <b>0.038</b>     | 2.29         | [ 0.19 - 27.6 ]  | 0.498        |
| <b>Concordance</b>                       | Concordant     | 86  | 12  | 14%    | 1          |                 |                  | 1            |                  |              |
|                                          | Discordant     | 38  | 10  | 26.30% | 2.2        | [0.84 - 5.69]   | 0.102            | 3.41         | [ 0.46 - 23.87 ] | 0.208        |
| <i>Interaction subtype / concordance</i> |                |     |     |        |            |                 |                  |              |                  | <b>0.02</b>  |

Abbreviations: BMI, body mass index; DCIS, ductal carcinoma in situ; ER, estrogen receptor; NST, no special type; PR, progesterone receptor; TNBC: triple negative breast cancer. Statistical tests were chi-square or fisher tests when indicated, all tests were two sided. In univariate analysis, exact p-values for BC subtype is p=0.0002.

Supplementary Table 8: Association between patient's tumor's characteristics and relapse-free survival (RFS), univariate and multivariate analysis.

| Variable name                            | Level          | Univariable |    |      |               | Multivariable |      |                  |        |
|------------------------------------------|----------------|-------------|----|------|---------------|---------------|------|------------------|--------|
|                                          |                | n=          | ev | HR   | 95%CI         | p             | HR   | 95%CI            | p      |
| <b>Age class</b>                         | <40            | 13          | 4  | 1    |               | 0.21          |      |                  |        |
|                                          | [40-50[        | 56          | 9  | 0.54 | [0.17 - 1.77] |               |      |                  |        |
|                                          | [50-60[        | 81          | 16 | 0.62 | [0.21 - 1.85] |               |      |                  |        |
|                                          | [60-70[        | 86          | 12 | 0.45 | [0.14 - 1.39] |               |      |                  |        |
|                                          | >=70           | 76          | 17 | 0.99 | [0.33 - 2.97] |               |      |                  |        |
| <b>BMI class</b>                         | 18.5-24.9      | 147         | 27 | 1    |               | 0.44          |      |                  |        |
|                                          | <18.5          | 7           | 0  | 0    | [0 - Inf]     |               |      |                  |        |
|                                          | 25-29.9        | 83          | 18 | 1.45 | [0.79 - 2.64] |               |      |                  |        |
|                                          | >=30           | 58          | 10 | 1.11 | [0.54 - 2.3]  |               |      |                  |        |
| <b>Previous pregnancy</b>                | No             | 50          | 13 | 1    |               | 0.12          |      |                  |        |
|                                          | Yes            | 248         | 42 | 0.61 | [0.33 - 1.14] |               |      |                  |        |
| <b>Menopausal status</b>                 | Premenopausal  | 89          | 18 | 1    |               | 0.82          |      |                  |        |
|                                          | Postmenopausal | 211         | 38 | 0.94 | [0.53 - 1.64] |               |      |                  |        |
| <b>BRCA mutation</b>                     | No             | 37          | 8  | 1    |               | 0.49          |      |                  |        |
|                                          | Yes            | 13          | 4  | 1.52 | [0.46 - 5.06] |               |      |                  |        |
| <b>Diagnostic modality</b>               | Non-palpable   | 355         | 59 | 1    |               | 0.04          |      |                  |        |
|                                          | Palpable       | 246         | 54 | 1.46 | [1.01 - 2.11] |               |      |                  |        |
| <b>Clinical T stage</b>                  | T0 or pTis     | 248         | 39 | 1    |               | <0.01         | 1.71 | [ 0.91 - 3.2 ]   | 0.094  |
|                                          | T1             | 173         | 23 | 0.84 | [0.5 - 1.41]  |               | 0.98 | [ 0.58 - 1.68 ]  | 0.95   |
|                                          | T2             | 147         | 33 | 1.58 | [0.99 - 2.51] |               | 1.42 | [ 0.85 - 2.38 ]  | 0.185  |
|                                          | T3             | 31          | 8  | 2.1  | [0.98 - 4.5]  |               | 1.64 | [ 0.74 - 3.64 ]  | 0.227  |
|                                          | T4             | 22          | 13 | 4.88 | [2.61 - 9.16] |               | 5.79 | [ 2.99 - 11.22 ] | <0.001 |
| <b>Clinical N stage</b>                  | cN0            | 552         | 92 | 1    |               | <0.01         |      |                  |        |
|                                          | cN1/N2/N3      | 72          | 24 | 2.54 | [1.62 - 3.98] |               |      |                  |        |
| <b>DCIS component</b>                    | DCIS           | 414         | 71 | 1    |               | 0.19          |      |                  |        |
|                                          | No DCIS        | 193         | 38 | 1.3  | [0.88 - 1.93] |               |      |                  |        |
| <b>Tumor grade</b>                       | 1              | 181         | 22 | 1    |               | <0.01         | 1    | -                | -      |
|                                          | 2              | 311         | 50 | 1.54 | [0.93 - 2.55] |               | 1.73 | [ 1.03 - 2.91 ]  | 0.039  |
|                                          | 3              | 116         | 37 | 2.9  | [1.71 - 4.92] |               | 2.22 | [ 1.19 - 4.16 ]  | 0.012  |
| <b>Intratumoral TILs (%)</b>             |                | 275         | 39 | 1    | [0.96 - 1.04] | 0.89          |      |                  |        |
| <b>Str TILs (%)</b>                      |                | 277         | 41 | 0.99 | [0.97 - 1.02] | 0.67          |      |                  |        |
| <b>Histological type</b>                 | lobular        | 114         | 21 | 1    |               | 0.79          |      |                  |        |
|                                          | NST            | 443         | 80 | 0.94 | [0.58 - 1.52] |               |      |                  |        |
|                                          | others         | 64          | 14 | 1.14 | [0.58 - 2.24] |               |      |                  |        |
| <b>Multifocality</b>                     | No / NA        | 438         | 75 | 1    |               | 0.16          |      |                  |        |
|                                          | Yes            | 188         | 41 | 1.31 | [0.9 - 1.92]  |               |      |                  |        |
| <b>BC subtype</b>                        | luminal        | 538         | 93 | 1    |               | <0.01         | 1    | -                | -      |
|                                          | TNBC           | 44          | 17 | 2.64 | [1.57 - 4.43] |               | 1.71 | [ 0.91 - 3.2 ]   | 0.094  |
|                                          | HER2+          | 32          | 4  | 0.64 | [0.24 - 1.75] |               | 0.34 | [ 0.1 - 1.1 ]    | 0.071  |
| <b>Concordance</b>                       | Concordant     | 512         | 96 | 1    |               | 0.58          |      |                  |        |
|                                          | Discordant     | 92          | 16 | 0.86 | [0.51 - 1.46] |               |      |                  |        |
| <i>Interaction subtype / concordance</i> |                |             |    |      |               | 0.46          |      |                  |        |

Abbreviations: BMI, body mass index; DCIS, ductal carcinoma in situ; ER, estrogen receptor; NST, no special type; PR, progesterone receptor; TNBC: triple negative breast cancer. Statistical tests were Wald test for the p-value for univariate and multivariate cox proportional hazard models, Exact p-values for Clinical T stage, Clinical N stage, Tumor grade and BC subtype are p= 9e-06, p= 4e-05, p= 5e-05, p= 8e-04 respectively.

Supplementary Table 9: Patient's and tumor's characteristics of the 6 patients and 20 samples with NGS data.

| patient number                        | Patient1               |            | Patient2                    |            | Patient3      |            | Patient4                      |            | Patient5       |            | Patient6                          |            |            |            |
|---------------------------------------|------------------------|------------|-----------------------------|------------|---------------|------------|-------------------------------|------------|----------------|------------|-----------------------------------|------------|------------|------------|
| Side                                  | Right                  | Left       | Right                       | Left       | Right         | Left       | Right                         | Left       | Right          | Left       | Right                             | Right      | Left       | Left       |
| Clinical T stage                      | T2                     | T2         | T2                          | T2         | T2            | T1         | T2                            | T4d        | T2             | T1         | T2                                | T2         | T3         | T3         |
| Clinical N stage                      | N0                     | N3         | N0                          | N0         | N0            | N0         | N0                            | N1         | N0             | N0         | N0                                | N0         | N3         | N3         |
| Age                                   | 42.5 y.o.              |            | 38.1 y.o.                   |            | 51 y.o.       |            | 72.4 y.o.                     |            | 69.5 y.o.      |            | 46 y.o.                           |            |            |            |
| Menopausal status                     | Premenopausal          |            | Premenopausal               |            | Premenopausal |            | Postmenopausal                |            | Postmenopausal |            | Premenopausal                     |            |            |            |
| BRCA germline mutation                | <b>BRCA1mut</b>        |            | <b>BRCA1mut</b>             |            | <b>BRCAwt</b> |            | <b>BRCA2mut</b>               |            | <b>BRCAwt</b>  |            | <b>BRCA2mut</b>                   |            |            |            |
| Mutation type                         | c.4484G>T/p.Arg1495Met |            | c.1380dupA/p.Phe461IlefsX19 |            |               |            | c.7406dup, p.(Thr2471Hisfs*4) |            |                |            | c.1310_1313del p.(Lys437Ilefs*22) |            |            |            |
| Pre-NAC parameters                    |                        |            |                             |            |               |            |                               |            |                |            |                                   |            |            |            |
| Subtype                               | TNBC                   | TNBC       | TNBC                        | TNBC       | luminal B     | luminal A  | luminal B                     | luminal B  | TNBC           | luminal B  | luminal A                         | luminal B  | luminal B  | luminal B  |
| ER status                             | ER neg                 | ER neg     | ER neg                      | ER neg     | ER ++ 90%     | ER ++ 90%  | ER +++ 95%                    | ER ++ 90%  | ER NA 5%       | ER + 25%   | ER ++ 80%                         | ER + 70%   | ER + 80%   | ER + 80%   |
| PR status                             | PR neg                 | PR neg     | PR neg                      | PR neg     | PR + 60%      | PR + 90%   | PR ++ 80%                     | PR neg     | PR neg         | PR neg     | PR ++ 60%                         | PR + 15%   | PR + 15%   | PR + 5%    |
| HER2 status                           | HER2 neg               | HER2 neg   | HER2 neg                    | HER2 neg   | HER2 neg      | HER2 neg   | HER2 neg                      | HER2 neg   | HER2 neg       | HER2 neg   | HER2 neg                          | HER2 neg   | HER2 neg   | HER2 neg   |
| Grade                                 | 3                      | 3          | 3                           | 3          | 2             | 1          | 2                             | 3          | 3              | 3          | 2                                 | 3          | 3          | 3          |
| Mitotic index                         | 100                    | 100        | 25                          | 45         | 7             | 0          | 14                            | 100        | 29             | 35         | 5                                 | 14         | 30         | 42         |
| Ki67                                  | NA                     | NA         | NA                          | NA         | 40            | 15         | 25                            | 25         | 30             | 80         | 10                                | 10         | 30         | 30         |
| Histological type                     | NST                    | NST        | NST                         | NST        | NST           | lobular    | NST                           | NST        | NST            | NST        | NST                               | NST        | NST        | NST        |
| Str TILs (%)                          | 5                      | 5          | 30                          | 25         | 5             | 20         | 50                            | 15         | 20             | 60         | 5                                 | 25         | 25         | 20         |
| Intratumoral TILs (%)                 | NA                     | NA         | 40                          | 20         | 2             | 10         | 30                            | 10         | 5              | 20         | 1                                 | 2          | 5          | 2          |
| Chemotherapy regimen                  | Antra-taxanes          |            | Antra-taxanes               |            | Antra-taxanes |            | Antra-taxanes                 |            | Antra-taxanes  |            | Antra-taxanes                     |            |            |            |
| Breast surgery                        | Mastectomy             | Mastectomy | Mastectomy                  | Mastectomy | Lumpectomy    | Lumpectomy | Lumpectomy                    | Mastectomy | Lumpectomy     | Lumpectomy | Mastectomy                        | Mastectomy | Mastectomy | Mastectomy |
| Axillar surgery                       | AND                    | AND        | AND                         | SND        | SND           | SND        | AND                           | AND        | SND            | AND        | AND                               | AND        | AND        | AND        |
| Post-NAC parameters                   |                        |            |                             |            |               |            |                               |            |                |            |                                   |            |            |            |
| RCB (class)                           | pCR                    | RCB-II     | pCR                         | pCR        | RCB-II        | RCB-II     | RCB-II                        | pCR        | RCB-II         | pCR        | RCB-II                            | RCB-II     | pCR        | pCR        |
| Number of positive nodes (post NAC)   | 0                      | 1          | 0                           | 0          | 0             | 0          | 2                             | 0          | 0              | 0          | 1                                 | 1          | 0          | 0          |
| Lymphovascular invasion (post NAC)    | no                     | no         | no                          | no         | yes           | no         | yes                           | NA         | no             | no         | no                                | no         | no         | no         |
| Mitotic index (post NAC)              | NA                     | 26         | NA                          | NA         | 1             | 0          | 12                            | NA         | 11             | NA         | NA                                | 1          | NA         | NA         |
| Str TILs (%)                          | 10                     | 20         | 1                           | 1          | 10            | 5          | 25                            | 15         | 25             | 10         | 5                                 | 5          | 5          | 5          |
| Intratumoral TILs (%)                 | NA                     | 10         | NA                          | NA         | 2             | 2          | 10                            | NA         | 5              | NA         | NA                                | 1          | NA         | NA         |
| Radiotherapy                          | Yes                    | Yes        | Yes                         | Yes        | Yes           | Yes        | Yes                           | Yes        | Yes            | Yes        | Yes                               | Yes        | Yes        | Yes        |
| Endocrine therapy                     | No                     |            | No                          |            | Yes           |            | Yes                           |            | No             |            | Yes                               |            |            |            |
| Survival outcomes                     |                        |            |                             |            |               |            |                               |            |                |            |                                   |            |            |            |
| Local relapse                         | No                     | Yes        | No                          | No         | No            | No         | No                            | No         | No             | No         | No                                | No         | No         | No         |
|                                       | <i>comment</i>         |            |                             |            |               |            |                               |            |                |            |                                   |            |            |            |
|                                       |                        |            |                             |            |               |            |                               |            |                |            |                                   |            |            |            |
| Distant metastasis                    |                        |            |                             |            |               |            |                               |            |                |            |                                   |            |            |            |
| Deaths                                |                        |            |                             |            |               |            |                               |            |                |            |                                   |            |            |            |
| Delay diagnosis to RFS event (months) | 18                     |            | 131                         |            | 90            |            | 95                            |            | 76             |            | 78                                |            |            |            |

Abbreviations: AND, axillary lymph node dissection; ER, estrogen receptor; intratumoral TIL, intratumoral tumor infiltrating lymphocytes; L, left; NAC, neoadjuvant chemotherapy; PR, progesterone receptor; R, right; RCB, residual cancer burden; SND, sentinel lymph node dissection; str TIL, stromal tumor infiltrating lymphocytes; wt, wild type.
